1 **Title:** A bright and high-performance genetically encoded  $\text{Ca}^{2+}$  indicator  
2 based on mNeonGreen fluorescent protein

3  
4 **Authors:** Landon Zarowny<sup>1</sup> (equal contribution), Abhi Aggarwal<sup>1,2</sup> (equal contribution),  
5 Virginia M.S. Rutten<sup>2,3</sup>, Ilya Kolb<sup>2</sup>, The GENIE Project<sup>2</sup>, Ronak Patel<sup>2</sup>, Hsin-Yi Huang<sup>4</sup>, Yu-Fen  
6 Chang<sup>4</sup>, Tiffany Phan<sup>1</sup>, Richard Kanyo<sup>5</sup>, Misha Ahrens<sup>2</sup>, W. Ted Allison<sup>5</sup>, Kaspar Podgorski<sup>2</sup>,  
7 Robert E. Campbell<sup>1,6</sup>

## 8 **Affiliations**

9 <sup>1</sup>Department of Chemistry, University of Alberta, Edmonton, Alberta, Canada

10 <sup>2</sup>Janelia Research Campus, Howard Hughes Medical Institute, Ashburn, Virginia, United States

11 <sup>3</sup>Gatsby Computational Neuroscience Unit, UCL, London, UK

12 <sup>4</sup>LumiSTAR Biotechnology, Inc. National Biotechnology Research Park, Taipei City 115, Taiwan

13 <sup>5</sup>Department of Biological Sciences, University of Alberta, Edmonton, Alberta, Canada

14 <sup>6</sup>Department of Chemistry, Graduate School of Science, The University of Tokyo, Tokyo, Japan

15

## 16 **Abstract**

17 Genetically encodable calcium ion ( $\text{Ca}^{2+}$ ) indicators (GECIs) based on green fluorescent  
18 proteins (GFP) are powerful tools for imaging of cell signaling and neural activity in model  
19 organisms. Following almost two decades of steady improvements in the *Aequorea victoria* GFP  
20 (avGFP)-based GCaMP series of GECIs, the performance of the most recent generation (i.e.,  
21 GCaMP7) may have reached its practical limit due to the inherent properties of GFP. In an effort  
22 to sustain the steady progression towards ever-improved GECIs, we undertook the  
23 development of a new GECI based on the bright monomeric GFP, mNeonGreen (mNG). The  
24 resulting indicator, mNG-GECO1, is 60% brighter than GCaMP6s *in vitro* and provides  
25 comparable performance as demonstrated by imaging  $\text{Ca}^{2+}$  dynamics in cultured cells, primary  
26 neurons, and *in vivo* in larval zebrafish. These results suggest that mNG-GECO1 is a promising

27 next-generation GECI that could inherit the mantle of GCaMP and allow the steady  
28 improvement of GECIs to continue for generations to come.

## 29 Introduction

30 Genetically encodable calcium ion ( $\text{Ca}^{2+}$ ) indicators (GECIs) are a class of single fluorescent  
31 protein (FP)-based biosensors that are powerful tools for the visualization of  $\text{Ca}^{2+}$  concentration  
32 dynamics both *in vitro* and *in vivo*<sup>1, 2, 3</sup>. As they are genetically encoded, GECI expression can  
33 be genetically targeted to specific cell types or subcellularly localized to specific organelles.  
34 Furthermore, their negligible cellular toxicity, minimal perturbation of endogenous cellular  
35 functions, and biological turnover, make them ideal for long-term imaging experiments<sup>4</sup>. The  
36  $\text{Ca}^{2+}$ -dependent fluorescent response of GECIs is routinely used as a proxy for neuronal activity  
37 due to the transient changes in  $\text{Ca}^{2+}$  concentration that accompany action potentials<sup>5, 6, 7, 8</sup>.  
38 GECIs have facilitated the optical recording of thousands of neurons simultaneously in the  
39 surgically exposed brains of mice<sup>9</sup>. Despite their widespread use by the scientific community,  
40 there are some properties of GECIs that could be further improved. These properties include  
41 faster  $\text{Ca}^{2+}$  response kinetics, higher fluorescent molecular brightness, and minimized  
42 contribution to  $\text{Ca}^{2+}$  buffering. Some GECIs have shown aggregation in neurons, and some of  
43 the most highly optimized GECIs have been demonstrated to cause aberrant cortical activity in  
44 murine models<sup>10, 11, 12</sup>.

45 An important issue that is common to all GECIs is their intrinsic  $\text{Ca}^{2+}$  buffering capacity.  
46 The  $\text{Ca}^{2+}$  binding domains of GECIs (calmodulin (CaM) or troponin C (TnC)) act as  $\text{Ca}^{2+}$  buffers  
47 within the cell and must necessarily compete with endogenous proteins for binding to  $\text{Ca}^{2+}$   
48 (Refs. 13, 14, 15, 16). Comprehensive investigations of this phenomenon are limited, but a few  
49 reports have indicated abnormal morphology and behavior of neurons after long term or high  
50 expression of GCaMPs<sup>17</sup>.  $\text{Ca}^{2+}$  buffering and competition for CaM binding sites have been  
51 proposed as possible causes. One solution to the  $\text{Ca}^{2+}$  buffering phenomenon is to reduce the  
52 reporter protein expression, leading to a lower concentration of GECI and reduced buffering  
53 capacity. However, reduced expression requires increased intensity of excitation light to achieve  
54 an equivalent fluorescent signal, which can lead to increased phototoxicity and photobleaching.  
55 Another solution is to reduce the number of  $\text{Ca}^{2+}$  binding sites like that in the TnC-based GECIs,  
56 NTnC<sup>18</sup> and YTnC<sup>19</sup>. Unfortunately, these indicators have relatively low fluorescence response  
57 ( $\Delta F/F_{\min} \sim 1$  for NTnC and  $\sim 10.6$  for YTnC) compared to the recent GCaMP7 variants ( $\Delta F/F_{\min} \sim$   
58  $21$  to  $145$ )<sup>20</sup>. Another possible solution is to develop GECIs with increased brightness such that

59 they could be expressed at a lower concentration while retaining a similar fluorescent intensity  
60 with similar intensity of excitation light.

61 Further increasing the brightness of GECIs, while retaining high performance  
62 comparable to the most recent generation of indicators, would provide improved tools for optical  
63 imaging of neuronal activity and decrease the occurrence of experimental artifacts resulting  
64 from  $\text{Ca}^{2+}$  buffering and indicator overexpression<sup>17</sup>. Our efforts to realize this advance were  
65 inspired, in part, by the advent of a bright and monomeric engineered version of GFP from  
66 *Branchiostoma lanceolatum*, mNeonGreen (mNG)<sup>21</sup>. Due to its high brightness and its excellent  
67 performance as a subcellular localization tag<sup>21</sup>, mNG is an exceptionally promising starting point  
68 from which to develop a brighter GECI.

69 Here we introduce an mNG-based genetically encodable Ca<sup>2+</sup> indicator for optical  
70 imaging (mNG-GECO1) that exceeds the brightness of all variants in the GCaMP series while  
71 providing performance that is comparable to the latest generation GCaMP variants. Key design  
72 differences between mNG-GECO1 and the GCaMP series include the GFP portion (mNG  
73 versus avGFP) and the protein topology (non-circularly permuted mNG versus circularly  
74 permuted avGFP).

75

## 76 **Results and Discussion**

### 77 **Rational engineering and iterative directed evolution of mNG-GECO1**

78 We used a combination of rational design, linker sequence optimization, and directed evolution  
79 to develop mNG-GECO1 (**Supplementary Fig. 1**). Starting from an unpublished topological  
80 variant of REX-GECO1<sup>22</sup>, we used PCR to produce a fragment containing CaM linked to the  
81 RS20 peptide with a short linker (**Fig. 1a**). Insertion of this PCR fragment into the mNG gene  
82 between residues 136 and 137 (numbering as in PDB ID 5LTR)<sup>23</sup> resulted in a green fluorescent  
83 indicator prototype which we named mNG-GECO0.1 (**Fig. 1**). For the remainder of this  
84 manuscript, amino acids will be numbered as in the sequence alignment provided as  
85 **Supplementary Fig. 2**. mNG-GECO0.1 had a minimal response to  $\text{Ca}^{2+}$  ( $\Delta F/F_{\min} = 0.3$ ), but we  
86 anticipated that optimization of the sequence around the insertion site would yield a suitable  
87 template for directed evolution. Indeed, we found that deletion of Ala146, the residue

88 immediately preceding the insertion of the Ca<sup>2+</sup> sensing domain, substantially improved the  
89 response to Ca<sup>2+</sup> (mNG-GECO0.2;  $\Delta F/F_{\min} \sim 2$ ).

90 Starting from mNG-GECO0.2, we began a process of iterative directed evolution which  
91 involved screening of libraries created from error-prone PCR or site saturation mutagenesis to  
92 identify variants with increased brightness and increased response to Ca<sup>2+</sup>. In our primary  
93 library screen, we used a fluorescent colony screening system equipped with excitation and  
94 emission filters appropriate for imaging of green fluorescence<sup>24</sup>. Bright colonies were picked and  
95 cultured overnight in liquid media. A secondary screen for Ca<sup>2+</sup> sensitivity was performed the  
96 next day using detergent-extracted bacterial lysate. The fluorescence of the lysate for each  
97 variant was measured in Ca<sup>2+</sup> chelating buffer (30 mM MOPS, 100 mM KCl, 10 mM EGTA, pH  
98 7.3), and subsequently in Ca<sup>2+</sup> saturating buffer (30 mM MOPS, 100 mM KCl, 10 mM Ca<sup>2+</sup>, pH  
99 7.3). Dividing the Ca<sup>2+</sup> saturated fluorescence by the Ca<sup>2+</sup> free fluorescence provided an  
100 approximate but robust measure of each indicator variant's response to Ca<sup>2+</sup>. For each round of  
101 screening the plasmids were isolated for the 6-10 most promising variants and sent for  
102 sequencing. The pool of these most promising variants was used as the template for the next  
103 round of library creation and directed evolution.

104 Following 7 rounds of iterative directed evolution, *E. coli* colonies harboring mNG-  
105 GECO0.7 were brightly fluorescent after overnight incubation. However, the Ca<sup>2+</sup> response of  
106 mNG-GECO0.7 was remained relatively low ( $\Delta F/F_{\min} \sim 5$ ), relative to recent generation GCaMP  
107 variants. We anticipated that optimization of the linkers connecting mNG to the CaM-RS20  
108 domain (mNG-CaM linker and RS20-mNG linker) could lead to the identification of variants with  
109 improved responses. To optimize these linker regions, we used site saturation mutagenesis to  
110 produce libraries of all 20 amino acids within the 3 residues connecting mNG to CaM. Individual  
111 libraries of Leu133, Thr134, and Ala135 were randomized to all 20 amino acids. If a beneficial  
112 mutation was found, the process was repeated for the remaining amino acids until these  
113 libraries were exhausted. By screening of these libraries, we identified two mutations of the  
114 linker region between mNG barrel and CaM: Ala145Gly and Leu143Ile. This variant, mNG-  
115 GECO0.9, had a  $\Delta F/F_{\min} \sim 12$  as measured *in vitro*.

116 Following optimization of the mNG-CaM linker, multiple site saturation libraries were  
117 created, using the same methodology as the mNG-CaM linker, for the RS20-mNG linker region  
118 (residues Glu323, Trp324, Cys325 and Arg326). Screening of these libraries led to the  
119 identification of a particularly bright variant with a Cys325Asn mutation. This variant, designated

120 mNG-GECO0.9.1, is brighter than mNG-GECO0.9 but has a decreased response to  $\text{Ca}^{2+}$  of  
121  $\Delta F/F_{\min} = 3.5$ . In an effort to improve the performance of mNG-GECO0.9.1, we applied site  
122 saturations to positions previously found to be mutated during directed evolution. Screening of  
123 these libraries for variants with increased brightness and higher  $\Delta F/F_{\min}$  led to the identification  
124 of a variant with Asp206Gly, Phe209Leu, Pro263Phe, Lys265Ser, Thr346Ile and the reversion  
125 of Gly152Glu. This variant was designated as mNG-GECO1. A notable observation from the  
126 directed evolution efforts is the minimal number of mutations in the mNG domain. Only 2  
127 mutations (Lys128Glu and Thr346Ile) were outside the  $\beta$ -strand in which the  $\text{Ca}^{2+}$  sensing  
128 domain was inserted. In contrast, 3 mutations were localized to the  $\beta$ -strand surrounding the  
129 sensing domain insertion site (Leu143Ile/Ala145Gly/Cys325Asn) and 7 mutations were localized  
130 to the CaM domain  
131 (Thr151Ala/Thr180Cys/Asp206Gly/Phe209Leu/Pro263Phe/Lys265Ser/Ala293Gly).

### 132 ***In vitro* characterization of mNG-GECO1**

133 We characterized mNG-GECO1, in parallel with GCaMP6s, for direct comparison of biophysical  
134 properties measured under identical conditions (**Supplementary Table 1**). We found that the  
135 excitation (ex) and emission (em) maxima of the  $\text{Ca}^{2+}$  saturated states to be 497 nm (ex) and  
136 512 nm (em) for GCaMP6s and 496 nm (ex) and 513 nm (em) for mNG-GECO1 (**Fig. 1**). The *in*  
137 *vitro*  $\text{Ca}^{2+}$  response of mNG-GECO1 ( $\Delta F/F_{\min} = 35$ ) was similar to that of GCaMP6s when tested  
138 in parallel ( $\Delta F/F_{\min} = 39$ ). The  $K_d$  of mNG-GECO1 (810 nM) is substantially higher than that of  
139 GCaMP6s (147 nM). This increase in  $K_d$  is consistent with the faster  $k_{\text{off}}$  kinetics of mNG-  
140 GECO1 ( $k_{\text{off}} = 1.57 \pm 0.01 \text{ s}^{-1}$ ) relative to GCaMP6s ( $k_{\text{off}} = 1.06 \pm 0.01 \text{ s}^{-1}$ ). There was no  
141 noticeable difference observed between the  $k_{\text{on}}$  kinetics of mNG-GECO1 and GCaMP6s with  
142 varying concentrations of  $\text{Ca}^{2+}$  (**Supplementary Fig. 3**).

143 In the  $\text{Ca}^{2+}$  bound state, mNG-GECO1 has an extinction coefficient of  $102,000 \text{ M}^{-1} \text{ cm}^{-1}$   
144 and quantum yield of 0.69, giving it an overall brightness (= EC \* QY) of 70. This value is similar  
145 to the value of 77 previously reported for NTnC<sup>18</sup> and 78% of the brightness of mNG itself  
146 (measured by us to be  $112,000 \text{ M}^{-1} \text{ cm}^{-1} * 0.8 = 90$ ) (**Supplementary Fig. 4**). Under two-photon  
147 excitation conditions, both mNG-GECO1 and GCaMP6s have a maximal two-photon cross  
148 section at  $\sim 970 \text{ nm}$  and similar action cross-section (AXS) values of 37.22 GM for mNG-  
149 GECO1 and 38.81 GM for GCaMP6s. However, due to its higher brightness at the single  
150 molecule level, the molecular brightness of mNG-GECO1 (21.3) is higher than that of GCaMP6s

151 (16.1) at 15 mW power. Overall, these data indicate the mNG-GECO1 has excellent one-photon  
152 and two-photon excitation properties *in vitro*.

153

#### 154 **In vitro characterization in cultured cells and dissociated neurons**

155 To compare the performance of mNG-GECO1 and GCaMP6s in cultured cells, we transfected  
156 HeLa cells with mNG-GECO1 in a pcDNA vector (CMV promoter) in parallel with pGP-CMV-  
157 GCaMP6s. Using a previously reported protocol<sup>25</sup>, Ca<sup>2+</sup> oscillations were induced by treatment  
158 with histamine and fluorescence images were acquired every 10 seconds for 20 minutes. From  
159 the intensity versus time data for each cell,  $\Delta F/F_0$  for all oscillations of  $\Delta F/F_0 > 0.5$  were  
160 extracted using a Matlab script. Using these extracted  $\Delta F/F_0$  values, average  $\Delta F/F_0$  for all  
161 oscillations and maximum  $\Delta F/F_0$ , was computed. The average maximum  $\Delta F/F_0$  was calculated  
162 by averaging the maximum  $\Delta F/F_0$  from each responding cell. In parallel experiments, mNG-  
163 GECO1 had an average  $\Delta F/F_0 = 4.50 \pm 2.96$  compared to GCaMP6s'  $\Delta F/F_0 = 3.48 \pm 2.40$  (**Fig.**  
164 **1h**). The maximum  $\Delta F/F_0$  was  $16.8 \pm 10.5$  for mNG-GECO1 and  $12.8 \pm 6.11$  for GCaMP6s. At  
165 the end of the 20-minute imaging experiment, the cells were treated with ionomycin/Ca<sup>2+</sup> to  
166 saturate the indicators and induce a fluorescent maximum and then with Ca<sup>2+</sup> chelator  
167 EGTA/ionomycin to deplete Ca<sup>2+</sup> and produce a fluorescent minimum. For these treatments,  
168  $\Delta F/F_{\min} = 48.8 \pm 15.1$  for mNG-GECO1 and  $\Delta F/F_{\min} = 16.7 \pm 5.2$  for GCaMP6s. These results  
169 were obtained from a data set of 137 responding cells with 1624 individual oscillations for mNG-  
170 GECO1 and 99 responding cells with 687 individual oscillations for GCaMP6s (**Supplementary**  
171 **Table 2**).

172 We next characterized the performance of mNG-GECO1 in dissociated rat cortical  
173 neurons alongside GCaMP series indicators GCaMP6s, jGCaMP7s, jGCaMP7b, jGCaMP7c,  
174 and jGCaMP7f (**Fig. 2**). Field stimulated neurons expressing mNG-GECO1 had a single action  
175 potential (AP)  $\Delta F/F_0 = 0.19 \pm 0.04$ , slightly lower than that of GCaMP6s ( $\Delta F/F_0 = 0.27 \pm 0.09$ ,  
176 **Fig. 2a**). For 10 APs, performance of mNG-GECO1 was approximately twofold lower than  
177 GCaMP6s, with  $\Delta F/F_0$  of  $1.5 \pm 0.19$  and  $3.1 \pm 0.26$  for mNG-GECO1 and GCaMP6s,  
178 respectively (**Fig. 2b**). At 160 APs, mNG-GECO1 has a  $\Delta F/F_0$  of  $6.5 \pm 0.8$ , slightly lower than  
179 GCaMP6s's  $\Delta F/F_0$  of  $9.0 \pm 0.47$  (**Fig. 2c**). The baseline brightness of mNG-GECO1 ( $1,374 \pm 31$   
180 AU) was comparable to the baseline brightness of GCaMP6s ( $1,302 \pm 6$  AU) and jGCaMP7s  
181 ( $1,397 \pm 11$  AU) (**Fig. 2e**). The signal-to-noise ratio (SNR) of mNG-GECO1 and GCaMP6s are

182 comparable for 1 and 3 AP's (**Fig. 2f**). For 3 AP stimulation, mNG-GECO1 exhibited a half rise  
183 time of  $49 \pm 1$  ms and half decay time of  $582 \pm 12$  ms. Under the same conditions, GCaMP6s  
184 exhibited a half rise time of  $65 \pm 2$  ms and a half decay time of  $1,000 \pm 36$  ms. Field stimulated  
185 neuron data is summarized in **Supplementary Table 3**. The overall data in cultured neuron  
186 suggest that the mNG-GECO1 sensor is comparable in signal, kinetics, and baseline brightness  
187 to the GCaMP6s sensor.

### 188 ***In vivo* evaluation of mNG-GECO1**

189 To evaluate mNG-GECO1 for *in vivo* expression in zebrafish neurons, we used a Tol2  
190 transposase transgenesis system to deliver mNG-GECO1 or GCaMP6s under a pan-neuronal  
191 Elavl3 promoter into zebrafish embryos<sup>26</sup>. We tracked expression of mNG-GECO1 over several  
192 days to evaluate the viability of transgenic fish (**Supplementary Fig. 5**). We found no obvious  
193 morphological anomalies during larval development stage of zebrafish expressing mNG-GECO1  
194 or GCaMP6s.

195 To evaluate the relative performance of mNG-GECO1 and GCaMP6s for imaging of  
196 neuronal activity in zebrafish larvae, we used the same transgenesis protocol to produce  
197 *Casper* zebrafish lines expressing each indicator (**Fig. 3**). Prior to imaging, 5-6 days post  
198 fertilization *Casper* fish expressing the sensors were immobilized with bungarotoxin (1 mg/mL)  
199 for 30 seconds followed by a 10 minute incubation in the convulsant 80 mM 4-aminopyridine (4-  
200 AP). The fish were then placed in low melting agar and immersed in a solution of 4-AP (80 mM).  
201 Imaging consisted of 5 minute intervals of the hindbrain or midbrain at a recording rate of 3 Hz.  
202 For each indicator, 5 fish were imaged under 6 different field of views resulting in 834 and 1280  
203 individual cells for mNG-GECO1 and GCaMP6s, respectively (**Supplementary Fig. 6**). The  
204 resulting data was evaluated using the Suite2p package  
205 (<https://github.com/MouseLand/suite2p>)<sup>27</sup>. We found that mNG-GECO1 had a maximum  $\Delta F/F_0$   
206 for each cell of  $3.09 \pm 0.08$  compared to  $4.56 \pm 0.11$  for GCaMP6s (**Fig. 3c**). The baseline  
207 fluorescence of GCaMP6s was higher compared to mNG-GECO1 ( $0.95 \pm 0.03$  vs  $1.41 \pm 0.05$   
208 AU, respectively) (**Fig. 3d**). However, the signal-to-noise ratio (SNR), which was computed by  
209 dividing the  $\Delta F/F_0$  by the raw standard deviation of each cell in six field of views, was higher for  
210 mNG-GECO1 (SNR =  $6.63 \pm 0.07$ ) than GCaMP6s (SNR =  $5.25 \pm 0.04$ ) (**Fig. 3e**). We also  
211 found that mNG-GECO1 had a slower decay time (faster  $k_{off}$  kinetics) compared to GCaMP6s  
212 ( $1.98 \pm 0.12$  s<sup>-1</sup> vs  $3.00 \pm 0.12$  s<sup>-1</sup>, respectively) (**Fig. 3f**). The overall data in zebrafish neurons

213 suggest that mNG-GECO1 is comparable in signal-to-noise ratio, kinetics, and baseline  
214 brightness to the GCaMP6s sensor (**Supplementary Table 4**).

## 215 $\text{Ca}^{2+}$ imaging in human iPSC-derived cardiomyocytes

216 Chemical  $\text{Ca}^{2+}$  dyes such as Fluo-4 acetoxymethyl (AM), Rhod-2 AM and Fura-2 AM are often  
217 used to phenotype  $\text{Ca}^{2+}$  transients in induced pluripotent stem cell-derived cardiomyocytes  
218 (iPSC-CM). However, these dyes can be toxic<sup>28, 29</sup> and may potentially suppress the activity of  
219  $\text{Na}^+$  and  $\text{K}^+$ -dependent adenosine triphosphatase<sup>30</sup>. As such, we tested whether mNG-GECO1  
220 could serve as a robust tool for observing cells signaling and drug response while preventing  
221 cellular toxicity in iPSC-CMs (**Supplementary Fig. 7**). We found that when iPSC-CMs  
222 expressing mNG-GECO1 or Fluo-4 AM were treated with 20 mM caffeine, mNG-GECO1 had a  
223 2.8 fold higher  $\Delta\text{F}/\text{F}$  response than Fluo-4 ( $\Delta\text{F}/\text{F} = 11.77 \pm 2.82$  and  $4.18 \pm 1.27$ , respectively)  
224 (**Supplementary Fig. 7a, b**). However, when cells were subjected to 0.33 Hz electrical  
225 stimulation for 30 minutes, mNG-GECO1 had a slightly lower peak  $\Delta\text{F}/\text{F}$  ( $2.26 \pm 0.81$ ) than Fluo-  
226 4 AM ( $3.31 \pm 1.42$ ) (**Supplementary Fig. 7c, d**). We suspect that this discrepancy is due to  
227 mNG-GECO1's lower affinity for  $\text{Ca}^{2+}$ . When we stimulated the cells in the presence of 20 mM  
228 caffeine, the max  $\Delta\text{F}/\text{F}$  of mNG-GECO1 ( $\Delta\text{F}/\text{F} = 14.20 \pm 4.67$ ) was higher than the max  $\Delta\text{F}/\text{F}$  of  
229 Fluo-4 AM ( $\Delta\text{F}/\text{F} = 6.73 \pm 1.19$ ) (**Supplementary Fig. 7e, f**). Based on this data, we propose  
230 that mNG-GECO1 may serve as a useful tool for phenotypic screening and functional tests in  
231 iPSC-CMs.

232

## 233 Conclusion

234 mNG-GECO1 is a new, first-generation, genetically encodable  $\text{Ca}^{2+}$  indicator that provides  
235 performance comparable to 6<sup>th</sup> and 7<sup>th</sup> generation GCaMP indicators. We have demonstrated  
236 that the *in vitro* performance of mNG-GECO1 in cultured HeLa cells is on par or better than  
237 GCaMP6s. However, *in vitro* cultured neuron benchmarking as well as *in vivo* imaging in  
238 transgenic zebrafish larvae have indicated that further directed evolution efforts will be required  
239 to produce an mNG-GECO1 variant that provides substantial advantages relative to the  
240 jGCaMP7 series. Further development of this indicator may come from increasing the  $\text{Ca}^{2+}$   
241 affinity which would enable more accurate single spike detection. In summary, we have  
242 developed a first generation GECl from the mNG scaffold that retains the high fluorescent  
243 brightness *in vitro* with performance comparable to the state-of-the-art GECl, GCaMP6s. We



244 expect mNG-GECO1 to be just as amenable to further optimization as the first generation  
245 GCaMP, and so mNG-GECO1 is likely to serve as the parent of a new and improved lineage of  
246 high performance GECIs.

## 247 **Author contributions**

248 LZ, AA, and TP performed the directed evolution experiments and *in vitro* characterization. RP  
249 performed the *in vitro* 2P characterization, IK and TGP conducted and analyzed the cultured  
250 neuron experiments. RK conducted the initial expression experiments of mNG-GECO1 and its  
251 variants in zebrafish under the supervision of WTA. VR completed the zebrafish characterization  
252 under the supervision of MA. HYH and YFC did the experiments in human iPSC-derived  
253 cardiomyocytes. LZ, AA, KP, and REC wrote and edited the manuscript. All authors were  
254 allowed to review and edit the manuscript before publication.

255

## 256 **Acknowledgments**

257 We thank the University of Alberta Molecular Biology Services Unit (Alberta) and Molecular Bio  
258 (Janelia) for technical support. We thank Christopher Cairo (Alberta), Andy Holt (Alberta) and  
259 Loren Looger (Janelia) for providing access to the instrumentation, Eric Schreiter (Janelia) for  
260 providing access to resources and for useful feedback regarding the manuscript. We thank  
261 Deepika Walpia (Janelia) and the JRC Histology group for preparing cultured neurons. We  
262 thank John Macklin (Janelia) for overseeing two-photon measurements. We thank Nathan  
263 Shaner for the mNeonGreen fluorescent protein. REC acknowledges the Japan Society for the  
264 Promotion of Science (JSPS), Natural Sciences and Engineering Research Council of Canada  
265 (NSERC), and Canadian Institutes of Health Research (CIHR), for funding support. The mNG  
266 gene was a kind gift from Jiwu Wang at Allele Biotech.

267

## 268 **References**

- 269 1. Mank M, Griesbeck O. Genetically encoded calcium indicators. *Chem Rev* **108**, 1550-1564 (2008).  
270 2. Akerboom J, *et al.* Optimization of a GCaMP Calcium Indicator for Neural Activity Imaging. *J*  
271 *Neurosci* **32**, 13819-13840 (2012).

- 272 3. Knopfel T. Genetically encoded optical indicators for the analysis of neuronal circuits. *Nat Rev*  
273 *Neurosci* **13**, 687-700 (2012).
- 274 4. Chen TW, *et al.* Ultrasensitive fluorescent proteins for imaging neuronal activity. *Nature* **499**,  
275 295-300 (2013).
- 276 5. Pologruto TA, Yasuda R, Svoboda K. Monitoring neural activity and [Ca<sup>2+</sup>] with genetically  
277 encoded Ca<sup>2+</sup> indicators. *J Neurosci* **24**, 9572-9579 (2004).
- 278 6. Tian L, Akerboom J, Schreier ER, Looger LL. Neural activity imaging with genetically encoded  
279 calcium indicators. *Prog Brain Res* **196**, 79-94 (2012).
- 280 7. Deo C, Lavis LD. Synthetic and genetically encoded fluorescent neural activity indicators. *Curr*  
281 *Opin Neurobiol* **50**, 101-108 (2018).
- 282 8. Broussard GJ, Liang R, Tian L. Monitoring activity in neural circuits with genetically encoded  
283 indicators. *Front Mol Neuro* **7**, 1-17 (2014).
- 284 9. Kim TH, *et al.* Long-Term Optical Access to an Estimated One Million Neurons in the Live Mouse  
285 Cortex. *Cell Rep* **17**, 3385-3394 (2016).
- 286 10. Podor B, Hu YL, Ohkura M, Nakai J, Croll R, Fine A. Comparison of genetically encoded calcium  
287 indicators for monitoring action potentials in mammalian brain by two-photon excitation  
288 fluorescence microscopy. *Neurophotonics* **2**, 1-7 (2015).
- 289 11. Bootman MD, Allman S, Rietdorf K, Bultynck G. Deleterious effects of calcium indicators within  
290 cells; an inconvenient truth. *Cell Calcium* **73**, 82-87 (2018).
- 291 12. Steinmetz NA, *et al.* Aberrant Cortical Activity in Multiple GCaMP6-Expressing Transgenic Mouse  
292 Lines. *eNeuro* **4**, 1-15 (2017).
- 293 13. Helmchen F, Imoto K, Sakmann B. Ca<sup>2+</sup> buffering and action potential-evoked Ca<sup>2+</sup> signaling in  
294 dendrites of pyramidal neurons. *Biophys J* **70**, 1069-1081 (1996).
- 295 14. Ashworth R, Zimprich F, Bolsover SR. Buffering intracellular calcium disrupts motoneuron  
296 development in intact zebrafish embryos. *Dev Brain Res* **129**, 169-179 (2001).
- 297 15. Briston SJ, Dibb KM, Solaro RJ, Eisner DA, Trafford AW. Balanced changes in Ca buffering by  
298 SERCA and troponin contribute to Ca handling during  $\beta$ -adrenergic stimulation in cardiac  
299 myocytes. *Cardiovascular Res* **104**, 347-354 (2014).
- 300 16. Timofeeva Y, Volynski KE. Calmodulin as a major calcium buffer shaping vesicular release and  
301 short-term synaptic plasticity: facilitation through buffer dislocation. *Front Cell Neuro* **9**, 239-239  
302 (2015).
- 303 17. Yang Y, *et al.* Improved calcium sensor GCaMP-X overcomes the calcium channel perturbations  
304 induced by the calmodulin in GCaMP. *Nat Commun* **9**, 1-18 (2018).
- 305 18. Barykina NV, *et al.* A new design for a green calcium indicator with a smaller size and a reduced  
306 number of calcium-binding sites. *Sci Rep* **6**, 1-15 (2016).
- 307 19. Barykina NV, *et al.* NTnC-like genetically encoded calcium indicator with a positive and enhanced  
308 response and fast kinetics. *Sci Rep* **8**, 1-19 (2018).
- 309 20. Dana H, *et al.* High-performance calcium sensors for imaging activity in neuronal populations  
310 and microcompartments. *Nat Methods* **16**, 649-657 (2019).
- 311 21. Shaner NC, *et al.* A bright monomeric green fluorescent protein derived from *Branchiostoma*  
312 *lanceolatum*. *Nat Methods* **10**, 407-409 (2013).
- 313 22. Wu J, *et al.* A long Stokes shift red fluorescent Ca<sup>2+</sup> indicator protein for two-photon and  
314 ratiometric imaging. *Nat Commun* **5**, 1-11 (2014).
- 315 23. Clavel D, *et al.* Structural analysis of the bright monomeric yellow-green fluorescent protein  
316 mNeonGreen obtained by directed evolution. *Acta Crystallogr, Sect D* **72**, 1298-1307 (2016).
- 317 24. Ai H-w, Baird MA, Shen Y, Davidson MW, Campbell RE. Engineering and characterizing  
318 monomeric fluorescent proteins for live-cell imaging applications. *Nat Protoc* **9**, 910-928 (2014).

- 319 25. Palmer AE, Tsien RY. Measuring calcium signaling using genetically targetable fluorescent  
320 indicators. *Nat Protoc* **1**, 1057-1065 (2006).
- 321 26. Kawakami K, Takeda H, Kawakami N, Kobayashi M, Matsuda N, Mishina M. A Transposon-  
322 Mediated Gene Trap Approach Identifies Developmentally Regulated Genes in Zebrafish. *Dev*  
323 *Cell* **7**, 133-144 (2004).
- 324 27. Pachitariu M, *et al.* Suite2p: beyond 10,000 neurons with standard two-photon microscopy.  
325 *bioRxiv*, 1-30 (2017).
- 326 28. Shinnawi R, *et al.* Monitoring Human-Induced Pluripotent Stem Cell-Derived Cardiomyocytes  
327 with Genetically Encoded Calcium and Voltage Fluorescent Reporters. *Stem Cell Reports* **5**, 582-  
328 596 (2015).
- 329 29. Chang Y-F, *et al.* Non-invasive phenotyping and drug testing in single cardiomyocytes or beta-  
330 cells by calcium imaging and optogenetics. *PLOS ONE* **12**, 1-17 (2017).
- 331 30. Smith NA, Kress BT, Lu Y, Chandler-Militello D, Benraiss A, Nedergaard M. Fluorescent Ca<sup>2+</sup>  
332 indicators directly inhibit the Na,K-ATPase and disrupt cellular functions. *Science Signaling* **11**, 1-  
333 14 (2018).
- 334 31. Cranfill PJ, *et al.* Quantitative assessment of fluorescent proteins. *Nat Methods* **13**, 557-562  
335 (2016).
- 336 32. Tsien R, Pozzan T. [14] Measurement of cytosolic free Ca<sup>2+</sup> with quin2. In: *Methods Enzymol.*  
337 Academic Press (1989).
- 338 33. Dweck D, Reyes-Alfonso A, Potter JD. Expanding the range of free calcium regulation in  
339 biological solutions. *Anal Biochem* **347**, 303-315 (2005).
- 340 34. Xu C, Webb WW. Measurement of two-photon excitation cross sections of molecular  
341 fluorophores with data from 690 to 1050 nm. *J Opt Soc Am B: Opt Phys* **13**, 481-491 (1996).
- 342 35. Mütze J, *et al.* Excitation Spectra and Brightness Optimization of Two-Photon Excited Probes.  
343 *Biophysical Journal* **102**, 934-944 (2012).
- 344 36. Palmer AE, Tsien RY. Measuring calcium signaling using genetically targetable fluorescent  
345 indicators. *Nat Protoc* **1**, 1057-1065 (2006).
- 346 37. Wardill TJ, *et al.* A Neuron-Based Screening Platform for Optimizing Genetically-Encoded  
347 Calcium Indicators. *PLOS ONE* **8**, e77728 (2013).
- 348 38. Thorn RJ, Clift DE, Ojo O, Colwill RM, Creton R. The loss and recovery of vertebrate vision  
349 examined in microplates. *PLOS ONE* **12**, 1-17 (2017).

## 351 **Methods**

### 352 **General procedures**

353 Synthetic DNA oligonucleotides and gBlocks were purchased from Integrated DNA  
354 Technologies. Plastic consumables, restriction endonucleases, Taq polymerase, Phusion  
355 polymerase, T4 DNA ligase, deoxynucleotides, DH10B *E. coli*, pBAD/His B plasmid,  
356 pcDNA3.1(+) plasmid, Bacterial Protein Extraction Reagent (B-PER), Penicillin-Streptomycin,  
357 Fetal Bovine Serum (FBS), TurboFect, Lipofectamine 2000, and GeneJet gel or plasmid  
358 purification kits were purchased from Thermo Scientific. Endotoxin-free plasmid DNA isolation  
359 kits were purchased from Qiagen (cat. 12362). Agarose,  $MnCl_2 \cdot 4H_2O$ , tryptone, D-glucose,  
360 ampicillin, L-arabinose, Hank's balanced salt solution (HBSS), DMEM, TrypLE Express, and LB  
361 Lennox media were purchased from Fisher Scientific. NbActiv4 and neuron transfection media  
362 were purchased from Brain Bits.

363 3-(N-morpholino)propanesulfonic acid (MOPS), ethylene glycol-bis(2-aminoethylether)-  
364 N,N,N',N'-tetraacetic acid (EGTA), and nitrilotriacetic acid (NTA), were purchased from VWR.  
365 Nickel NTA immobilized metal affinity chromatography protein purification beads were  
366 purchased from G-BioSciences. Ionomycin and tricaine methanesulfonate were purchased from  
367 Millipore-Sigma. Ethidium bromide and PCR machines (T100 Thermal Cycler) were purchased  
368 from BioRad. Gibson Assembly reagent was purchased from New England Biolabs (NEB).  
369 Genemorph II Random Mutagenesis kits and QuikChange mutagenesis kits were purchased  
370 from Agilent Technologies. Nunc 96-Well Polypropylene DeepWell Storage Plates (cat. 278743)  
371 and 96-well Nunc MicroWell 96-Well Optical-Bottom Plates (cat. 265301) were purchased from  
372 Thermo Scientific. Molecular weight cut off filters were purchased from Millipore-Sigma.  
373 Sequencing was completed by the Molecular Biology Services Unit at the University of Alberta.

### 374 **Molecular biology and protein engineering**

375 Libraries for iterative directed evolution were created using Genemorph II Random Mutagenesis  
376 kits and NEB's Gibson Assembly reagent. Blunt ended linear DNA fragments with random  
377 mutations are created using the Genemorph II kit according to the manufacturer's  
378 recommendations. Genemorph II PCR product was ligated using NEB Gibson Assembly  
379 reagent into a linearized pBAD vector cut with XhoI/HindIII. Site saturation mutagenesis libraries  
380 were created using single and multi QuikChange mutagenesis kits according the manufacturers  
381 recommendations.

382 Libraries are transformed into DH10B *E. coli* and plated on 100 µg/L ampicillin/1.5% agar plates  
383 with 0.02% L-arabinose and grown overnight (12-18 hours) at 37 °C. Colonies are selected on  
384 the basis of fluorescence intensity, picked, and placed into 96 DeepWell blocks containing 1.3  
385 mL of LB Lennox media supplemented with 100 µg/mL ampicillin and 0.02% L-arabinose.  
386 Deepwell blocks were shaken overnight at 37 °C. The next day, blocks are centrifuged at 6000  
387 × g for 5 minutes to pellet cells. Media was discarded and 30 µL of B-PER was added to each  
388 well. After shaking for 15 minutes, 200 µL of 10 mM EGTA in 30 mM MOPS/100 mM KCl pH 7.2  
389 (MOPS/KCl buffer) is added to each well of the blocks before mixing briefly and being  
390 centrifuged again for 5 minutes at 6000 × g. 90 µL of the resulting lysate is loaded in each well  
391 of 96-well optical bottom plates. Fluorescence intensity for each well of the plate is then read  
392 with a Tecan Safire<sup>2</sup> microplate reader to determine the low Ca<sup>2+</sup> intensity for each variant. High  
393 Ca<sup>2+</sup> intensity is acquired by adding 15 µL of 100 mM Ca<sup>2+</sup> in 30 mM MOPS pH 7.2 with a 60  
394 second shake before reading. Taking the value of the high Ca<sup>2+</sup> intensity divided by the low Ca<sup>2+</sup>  
395 intensity gives a relative sensitivity value. Promising candidates, usually 10% of each 96-well  
396 block, are retested from the lysate in 10 mM low (EGTA chelated) and 10 mM high Ca<sup>2+</sup> solution  
397 diluted in MOPS/KCl buffer. The plasmids associated with the promising variants are sent for  
398 sequencing and used as template for the next round of directed evolution. For cultured neuron  
399 field stimulation experiments, GCaMP6s, jGCaMP7f, jGCaMP7s, jGCaMP7c, and jGCaMP7b  
400 plasmids (available on Addgene) were subcloned into a syn-<GCaMP>-IRES-mCherry-WPRE-  
401 pA vector.

402 Constructs for zebrafish transfection were created by ligating mNG-GECO1 PCR product into a  
403 Tol2 transposon backbone. Briefly, PCR of mNG-GECO variants were ligated into Tol2-HuC-  
404 H2B vector (Addgene plasmid #59530) cut with Sall/Agel using Gibson Assembly. The ligated  
405 constructs were transformed into NEB Turbo Competent *E. coli* cells and grown in 250 µL  
406 culture overnight at 30 °C. The next day, the culture is pelleted, and the DNA is purified using  
407 endotoxin-free plasmid DNA purification protocol using EndoFree Plasmid Maxi Kit. The DNA is  
408 eluted with EF-free H<sub>2</sub>O and verified by sequencing.

#### 409 **Protein purification and *in vitro* characterization**

410 To purify mNG, mNG-GECO variants, and GCaMP6s for *in vitro* characterization, pBAD/His B  
411 plasmid containing the gene of interest was used to transform electrocompetent DH10B *E. coli*,  
412 which were then streaked on 100 µg/mL ampicillin/1.5% agar plates. After overnight incubation  
413 at 37 °C, a single colony was picked and inoculated to a 2 L flask containing 500 mL of 100

414  $\mu\text{g/mL}$  ampicillin/0.02% L-arabinose liquid media and cultured for 24-30 hours at 37 °C. The  
415 culture is then centrifuged at  $6000 \times g$  for 6 minutes to collect the cells. Cells are re-suspended  
416 in 30 mL of cold Tris buffered saline (TBS, 150 mM NaCl, 50 mM Tris-HCl) pH 8.0 and lysed by  
417 sonication (QSonica Q700, amplitude 50, 1 second on, 2 seconds off, 3 minutes sonication  
418 time). All subsequent purification procedures were performed on ice. The resulting lysate was  
419 clarified of cell debris by centrifugation for 1 hour at  $21,000 \times g$ , filtered through a Kim-wipe into  
420 a 50 mL conical bottom tube, and incubated for 3 hours with Ni-NTA resin. Resin containing  
421 NTA bound protein was washed with 100 mL of 20 mM imidazole TBS wash buffer and eluted  
422 with 250 mM imidazole TBS elution buffer. Purified protein was buffer exchanged into TBS  
423 using a 10,000 Da molecular weight cut-off filter (Millipore-Sigma) through 3 successive  
424 washes. Absorption spectra were recorded on a Beckman-Coulter DU-800 UV-visible  
425 spectrophotometer and fluorescence spectra recorded on a Tecan Safire<sup>2</sup> plate reader.

426 Extinction coefficient determination for mNG-GECO variants were performed using the alkaline  
427 denaturation method with mNG as a standard<sup>31</sup>. Briefly, the concentration of protein was  
428 adjusted by dilution in MOPS/KCl pH 7.2 to reach an absorbance of 0.6 to 1.0. A dilution series  
429 with MOPS/KCl and 10 mM  $\text{Ca}^{2+}$  was then prepared with absorbances of 0.01, 0.02, 0.03, 0.04,  
430 and 0.05 for mNG, mNG-GECO variants, and GCaMP6s. Integration of the fluorescent peaks  
431 provides a total fluorescent emission value which was plotted against the absorbance to provide  
432 a slope. The quantum yields of mNG-GECO variants were determined using the published<sup>31</sup> QY  
433 value of mNG in a ratiometric manner:

434 
$$\Phi_{\text{protein}} = \Phi_{\text{standard}} \times (S_{\text{protein}}/S_{\text{standard}})$$

435 Extinction coefficients were determined by measuring the absorption spectrum in MOPS/KCl pH  
436 7.2 and 2 M NaOH. The absorbance value for the denatured GFP peak at 440 nm was divided  
437 by the previously determined extinction coefficient of  $44,000 \text{ M}^{-1}\text{cm}^{-1}$  to give the concentration of  
438 protein<sup>31</sup>. Using Beer's law, the extinction coefficient was then determined by dividing the TBS  
439 sample absorbance maximum by the calculated protein concentration.

440 Determination of  $K_d$  was performed as previously described<sup>32, 33</sup>. Briefly, a reciprocal dilution  
441 series was created with either 10 mM EGTA/10 mM  $\text{Ca}^{2+}$  EGTA ranging in free  $\text{Ca}^{2+}$   
442 concentration of 0 to 0.039 mM or 10 mM NTA/10 mM  $\text{Ca}^{2+}$  NTA ranging in free  $\text{Ca}^{2+}$   
443 concentration from 0 to 1.13 mM<sup>33</sup>. An equal amount of purified mNG-GECO was diluted 100×

444 into 100  $\mu\text{L}$  of buffer and the intensity plotted against free  $\text{Ca}^{2+}$  in triplicate. The data are then fit  
445 to a four-parameter variable-slope in GraphPad Prism 7 software to determine the  $K_d$ .

## 446 **Two Photon Measurements**

447 The two photon measurements were performed in 39  $\mu\text{M}$  free  $\text{Ca}^{2+}$  (+ $\text{Ca}^{2+}$ ) buffer (30 mM  
448 MOPS, 10 mM CaEGTA in 100 mM KCl, pH 7.2) or 0  $\mu\text{M}$  free  $\text{Ca}^{2+}$  (- $\text{Ca}^{2+}$ ) buffer (30 mM  
449 MOPS, 10 mM EGTA in 100 mM KCl, pH 7.2). The two photon excitation spectra were acquired  
450 as previously described<sup>2</sup>. Protein solution of 2 – 4  $\mu\text{M}$  concentration in + $\text{Ca}^{2+}$  or - $\text{Ca}^{2+}$  buffer was  
451 prepared and measured using an inverted microscope (IX81, Olympus) equipped with a 60 $\times$ ,  
452 1.2 NA water immersion objective (Olympus). Two photon excitation was obtained using an 80  
453 MHz Ti-Sapphire laser (Chameleon Ultra II, Coherent) for spectra from 710 nm to 1080 nm.  
454 Fluorescence collected by the objective was passed through a short pass filter (720SP,  
455 Semrock) and a band pass filter (550BP200, Semrock), and detected by a fiber-coupled  
456 Avalanche Photodiode (APD) (SPCM\_AQRH-14, Perkin Elmer). The obtained two photon  
457 excitation spectra were normalized for 1  $\mu\text{M}$  concentration and further used to obtain the action  
458 cross-section spectra (AXS) with fluorescein as a reference<sup>34</sup>.

459 Fluorescence correlation spectroscopy (FCS) was used to obtain the 2P molecular brightness of  
460 the protein molecule. The molecular brightness was defined by the rate of fluorescence  
461 obtained per total number of emitting molecules. 50-200 nM protein solutions were prepared in  
462 + $\text{Ca}^{2+}$  buffer and excited with 940 nm wavelength at various power ranging from 2-30 mW for  
463 200 seconds. The obtained fluorescence was collected by an APD and fed to an autocorrelator  
464 (Flex03LQ, Correlator.com). The obtained autocorrelation curve was fit on a diffusion model  
465 through an inbuilt Matlab function<sup>35</sup> to determine the number of molecules  $\langle N \rangle$  present in the  
466 focal volume. The 2-photon molecular brightness ( $\epsilon$ ) at each laser power was calculated as the  
467 average rate of fluorescence  $\langle F \rangle$  per emitting molecule  $\langle N \rangle$ , defined as  $\epsilon = \langle F \rangle / \langle N \rangle$  in  
468 kilocounts per second per molecule (kcpsm). As a function of laser power, the molecular  
469 brightness initially increases with increasing laser power, then levels off and decreases due to  
470 photobleaching or saturation of the protein chromophore in the excitation volume. The maximum  
471 or peak brightness achieved,  $\langle \epsilon_{max} \rangle$ , represents a proxy for the photostability of a fluorophore.

## 472 ***In vitro* kinetics analysis by stopped-flow**

473 Rapid kinetic measurements of purified mNG-GECO1 and GCaMP6s were made using an  
474 Applied Photophysics SX-20 Stopped-flow Reaction Analyzer exciting at 488 nm with 2 nm

475 bandwidth and collecting light at 520 nm through a 10 mm path at room temperature. Briefly, 2  
476  $\mu\text{M}$  of mNG-GECO1 and GCaMP6s proteins in 1 mM  $\text{Ca}^{2+}$  (30 mM MOPS, 100 mM KCl, pH 7.2)  
477 were rapidly mixed at 1:1 ratio with 50 mM of EGTA (same buffer as above) at room  
478 temperature.  $k_{\text{off}}$  values were determined by fitting a single exponential dissociation curve to the  
479 signal decay using Graphpad Prism, with units of  $\text{s}^{-1}$ . For  $k_{\text{on}}$ , both proteins buffered in 30 mM  
480 MOPS, 100 mM KCl, 50  $\mu\text{M}$  EGTA were rapidly mixed at 1:1 ratio with varying concentrations of  
481  $\text{Ca}^{2+}$  produced by reciprocal dilutions of 10 mM EGTA and 10 mM CaEGTA. The measured  
482 fluorescence change overtime was fitted using a 2-phase association curve to obtain the slow  
483 and fast observed rate constants ( $k_{\text{obs}}$ ) for each free  $\text{Ca}^{2+}$  concentration. All measurements were  
484 done in triplicates, and values are reported as mean  $\pm$  s.e.m. where noted.

### 485 **Fluorescence live cell imaging**

486 **Imaging in HeLa cells.** We followed previously reported protocols for our  $\text{Ca}^{2+}$  imaging  
487 experiments<sup>36</sup>. Briefly, HeLa cells cultured in DMEM with 10% fetal bovine serum supplemented  
488 with penicillin-G potassium salt (50 units/mL) and streptomycin sulphate (50  $\mu\text{g}/\text{mL}$ ) were plated  
489 on collagen coated 35 mm glass bottom dishes. HeLa cells are transfected at 60% confluency  
490 with 1  $\mu\text{g}$  of pcDNA3.1(+) harboring the variant of interest using 2  $\mu\text{L}$  of TurboFect according to  
491 the manufacturer's recommendation. After overnight incubation at 37 °C with 5%  $\text{CO}_2$ , cells  
492 were washed twice with prewarmed Hank's balanced salt solution immediately before imaging.

493 Imaging of transfected HeLa cells was performed on an inverted Zeiss 200M microscope with  
494 Semrock filters (excitation 470/40, emission 525/50) and captured with an OrcaFlash 4.0 –  
495 C13440 (Hamamatsu). Images were acquired through a 40 $\times$  (N.A. 1.3) oil immersion lens using  
496 MetaMorph 7.8.0.0 software and an MS-2000 automated stage (Applied Scientific  
497 Instrumentation).

### 498 **Imaging in dissociated rat cortical neurons.**

499 The mNG-GECO1 indicator was compared to other GECIs in a field stimulation assay<sup>37</sup>.  
500 Neonatal (P0) rat pups were euthanized, and their cortices were dissected and dissociated  
501 using papain (Worthington). Cells were transfected by combining  $5 \times 10^5$  viable cells with 400 ng  
502 plasmid DNA and nucleofection solution electroporation cuvettes (Lonza). Electroporation was  
503 performed according to the manufacturer instructions. Cells were then plated at a density of  
504  $5 \times 10^5$  cells/well in poly-D-lysine (PDL) coated 96-well plates. After 14-18 days in vitro, culture  
505 medium was exchanged for an imaging buffer solution with a drug cocktail to inhibit synaptic



506 transmission<sup>37</sup>. The field stimulation assay was performed as previously described<sup>4, 20, 37</sup>. Briefly,  
507 neurons were field stimulated (1, 2, 3, 5, 10, 20, 40, 160 pulses at 83 Hz, 1 ms, 40V), and  
508 concurrently imaged with an electron multiplying charge coupled device (EMCCD) camera  
509 (Andor iXon DU897-BV, 198 Hz, 4x4 binning, 800 x 800  $\mu\text{m}$ , 1,400 frames). Reference images  
510 were taken after stimulation to perform cell segmentation during analysis. Illumination was  
511 delivered by blue light (470 nm, Cairn Research Ltd; excitation: 450-490 nm; emission: 500-550  
512 nm; dichroic: 495 nm long-pass). The illumination power density was measured to be 19  
513  $\text{mW}/\text{mm}^2$  at the sample. Stimulation pulses were synchronized with the camera using data  
514 acquisition cards (National Instruments), controlled with Wavesurfer software  
515 (<https://wavesurfer.janelia.org/>). Imaging was performed at room temperature. Data were  
516 analyzed using previously-developed MATLAB (Mathworks) scripts<sup>20, 37</sup>.

### 517 **Ca<sup>2+</sup> imaging in human iPSC-derived cardiomyocytes**

518 Human iPSC-derived cardiomyocytes (human iPSC Cardiomyocytes - male | ax2505) were  
519 purchased from Axol Bioscience. The 96 well glass-bottom plate or MatTek glass bottom dish  
520 (Ashland, MA, US) were first coated with Fibronectin/Gelatin (0.5% / 0.1%) at 37 °C for at least  
521 1 hour. The cells were plated and cultured for three days in Axol's Cardiomyocyte Maintenance  
522 Medium. The cells then were ready for final observation with Tyrode's buffer. For electrical  
523 stimulations, iPSC derived cardiomyocytes were plated on MatTek glass bottom dish (Ashland,  
524 MA, US) at 100,000 cells/well. Electrical stimulation was done with 10 V, 10 ms duration and 3  
525 seconds interval using myopacer (Ion optix c-pace ep). To image, an inverted microscope  
526 (DMI8, Leica) equipped with a 63x objective lens (NA 1.4) and a multiwavelength LED light  
527 source (pE-4000, CoolLED) was used. iPSC derived cardiomyocytes were plated out as above,  
528 and then loaded with 5  $\mu\text{M}$  Fluo-4-AM (Thermo-Fisher, UK) at room temperature for 10 minutes,  
529 free dye was washed off by media replacement with pre-heated culture media, followed by  
530 imaging with iXon EMCCD (Andor) camera using 488 nm LED illumination. The GFP filter set  
531 (DS/FF02-485/20-25, T495lpxr dichroic mirror, and ET525/50 emission filter) was used for Fluo-  
532 4 and mNG-GECO1 observation.

### 533 **Imaging of zebrafish larvae.**

534 To demonstrate the sensitivity and brightness of mNG-GECO1 *in vivo*, we performed  
535 fluorescence imaging of Ca<sup>2+</sup> activity in a subset of neurons in larval zebrafish. Initially, we used  
536 the AB/WIK zebrafish strain for morphology studies (**Supplementary Fig. 4**), which were  
537 treated with 1-phenol-2-thiourea (PTU) to inhibit pigmentation, as described previously<sup>38</sup>. Later,

538 *Casper* strains were available and 20 ng/μL DNA plasmids encoding mNG-GECO1 under the  
539 control of nuclear-localized *elavl3*/HuC promoter (Addgene: 59530) were injected into two-cell  
540 stage embryos of *Casper* mutant zebrafish<sup>33</sup> with 40 ng/μl Tol2 transposase mRNA (26) to  
541 generate F0 transgenic zebrafish. Imaging experiments were performed using 6 day old  
542 embryos. Embryos showing expression were treated with 1 mg/mL bath-applied α-bungarotoxin  
543 (Thermo Fischer Scientific, B1601) dissolved in external solution for 30 seconds to block  
544 movement, and subsequently incubated with 80 mM 4-aminopyridine (4AP) for 10 minutes.  
545 After incubation, the larvae were embedded in 2% low melting temperature agarose to prevent  
546 motion. For earlier imaging (**Supplementary Fig. 4**) a Zeiss 700 confocal microscope was used  
547 with A-Plan 10x/0.25 Ph1 M27 objective lens to obtain picture from the whole larvae  
548 (**Supplementary Fig. 4a**). For enlarged areas (**Supplementary Fig. 4b-e**), a Plan-Apochromat  
549 20x/0.8 M27 lens was used. Later imaging was performed using a 488 nm laser (0.45 μM) and a  
550 525/50 nm emission filter at 3 Hz using Zeiss 880 confocal microscope. The laser power was  
551 set to 2.3%, gain 720, and pinhole to 29.3% open. Image acquisition, data registration,  
552 segmentation and cell traces were handled using theSuite2p package in Python. All animal  
553 procedures were approved by the Institutional Animal Care and Use Committee at the HHMI  
554 Janelia Research Campus or by the Animal Care and Use Committee: Biosciences at the  
555 University of Alberta.

556 **Figures and Supplementary Data**

557

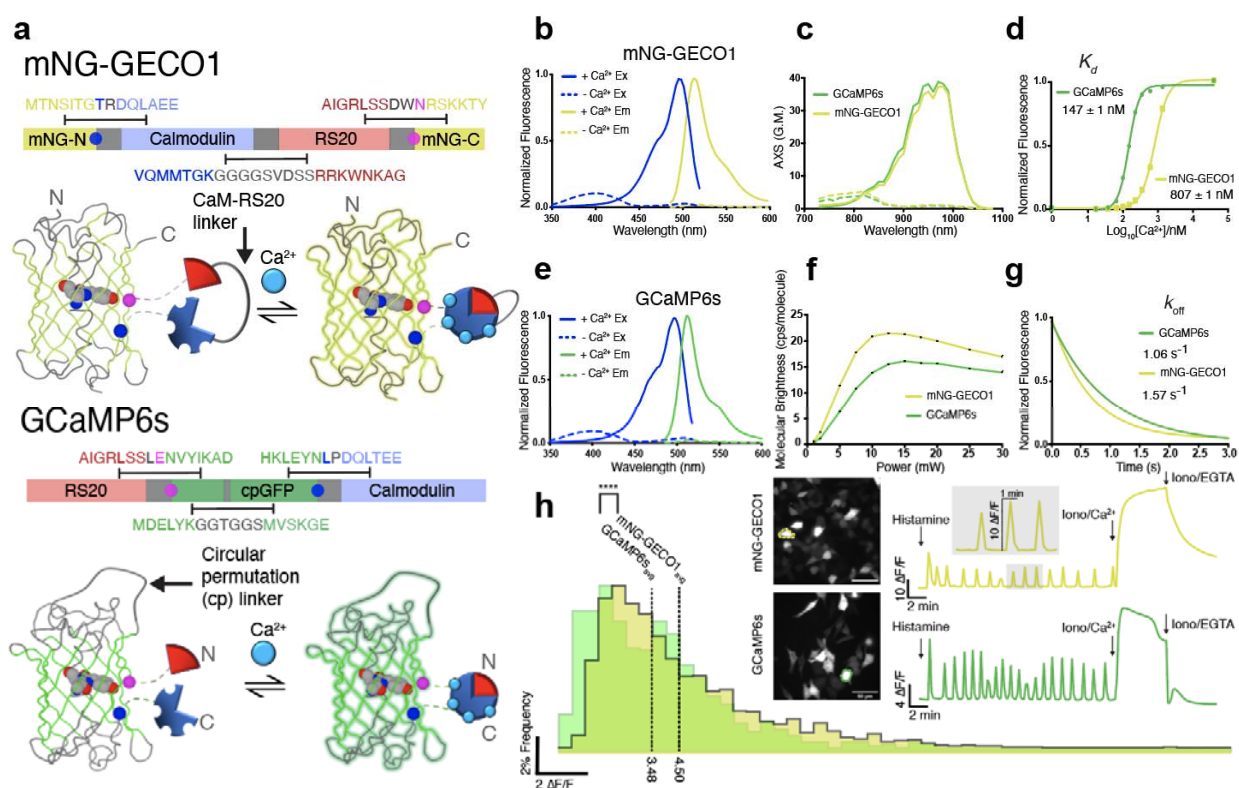

558

559 **Figure 1 Topology and *in vitro* characterization of mNG-GECO1 and GCaMP6s**

560 **a** Topology of non-circularly permuted mNG-GECO1 and circularly permuted GCaMP6s. Linker  
 561 regions are shown in grey and the two residues that flank the insertion site (residue 136 of mNG  
 562 in blue and residue 139 in magenta; numbering as in PDB ID 5LTR)<sup>23</sup> are shown as circles on  
 563 both the protein structure and gene schematics. The Ca<sup>2+</sup> responsive domains are shaded light  
 564 blue for CaM and light red for RS20. **b,e** Excitation and emission spectra for each indicator. **c** 2-  
 565 photon cross section for each indicator in Ca<sup>2+</sup> saturated or Ca<sup>2+</sup> free states. **d** Ca<sup>2+</sup> titration for  
 566 GCaMP6s ( $K_d = 147 \pm 1$  nM) and mNG-GECO1 ( $807 \pm 1$  nM). **f** Dependence of two-photon  
 567 molecular brightness on excitation power intervals. **g** Stop-flow kinetics for each indicator  
 568 showing mNG-GECO1 ( $k_{off} 1.57$  s<sup>-1</sup>) and GCaMP6s ( $k_{off} 1.06$  s<sup>-1</sup>). **h** Characterization of  
 569 histamine induced Ca<sup>2+</sup> oscillations in HeLa cells with representative traces inset.

570

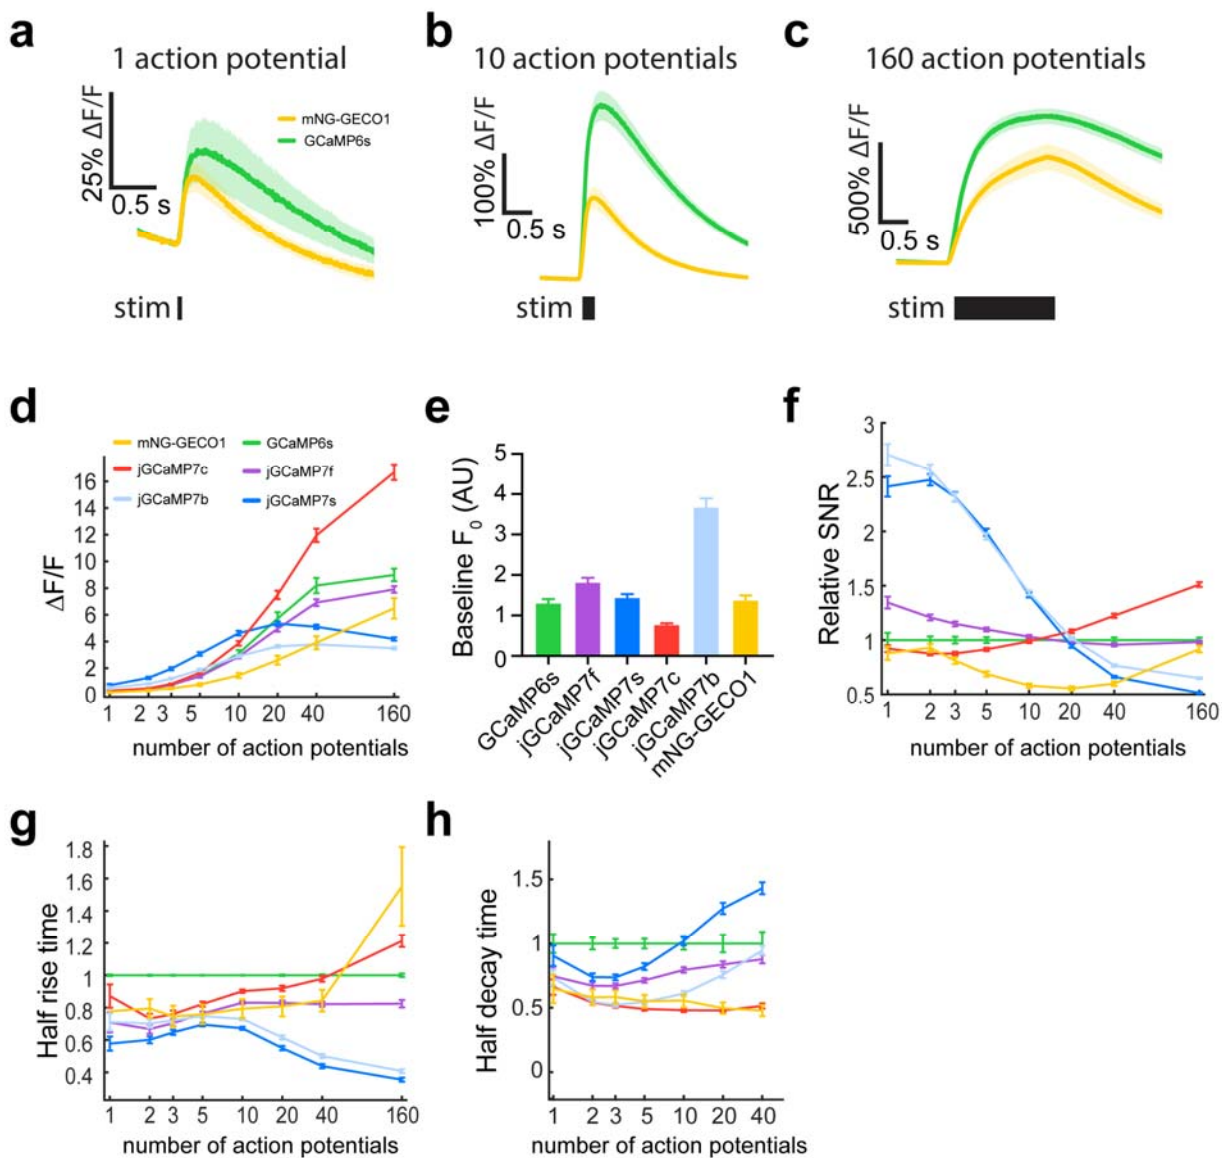

571

572 **Figure 2 Characterization of mNG-GECO1 and GCaMP series indicators in dissociated rat**  
573 **hippocampal neurons**

574 **a-c** Average responses to 1, 10, and 160 action potentials for mNG-GECO1 and GCaMP6s.  
575 Shaded areas correspond to s.e.m. for each trace. **d** Response amplitude  $\Delta F/F_0$  for mNG-  
576 GECO1 and the GCaMP series of indicators in response to 1, 2, 3, 5, 10, 20, 40, and 160 action  
577 potentials. Data are presented normalized to  $\Delta F/F_0$  of GCaMP6s. **e** Baseline brightness for each  
578 indicator, defined as the mean raw fluorescence intensity of all neurons prior to the stimulus. **f**  
579 Relative SNR, defined as the peak raw fluorescence divided by the signal standard deviation  
580 prior to the stimulus, normalized to SNR of GCaMP6s. **g** Half-rise time normalized to GCaMP6s.

581 **h** Half-decay time normalized to GCaMP6s. The 160 action potential measurement was omitted  
582 because fluorescence levels generally did not return to baseline over the imaging period. For **a-**  
583 **h**, mNG-GECO1: 621 neurons, 15 wells; GCaMP6s: 937 neurons, 17 wells; jGCaMP7c: 2,551  
584 neurons, 44 wells; jGCaMP7b: 2,339 neurons, 47 wells; jGCaMP7f: 2,585 neurons, 48 wells;  
585 and jGCaMP7s: 2,249 neurons, 47 wells. Data in **d-h** shown as mean  $\pm$  s.e.m., see  
586 **Supplementary Table 3** for analyzed data.

587

588

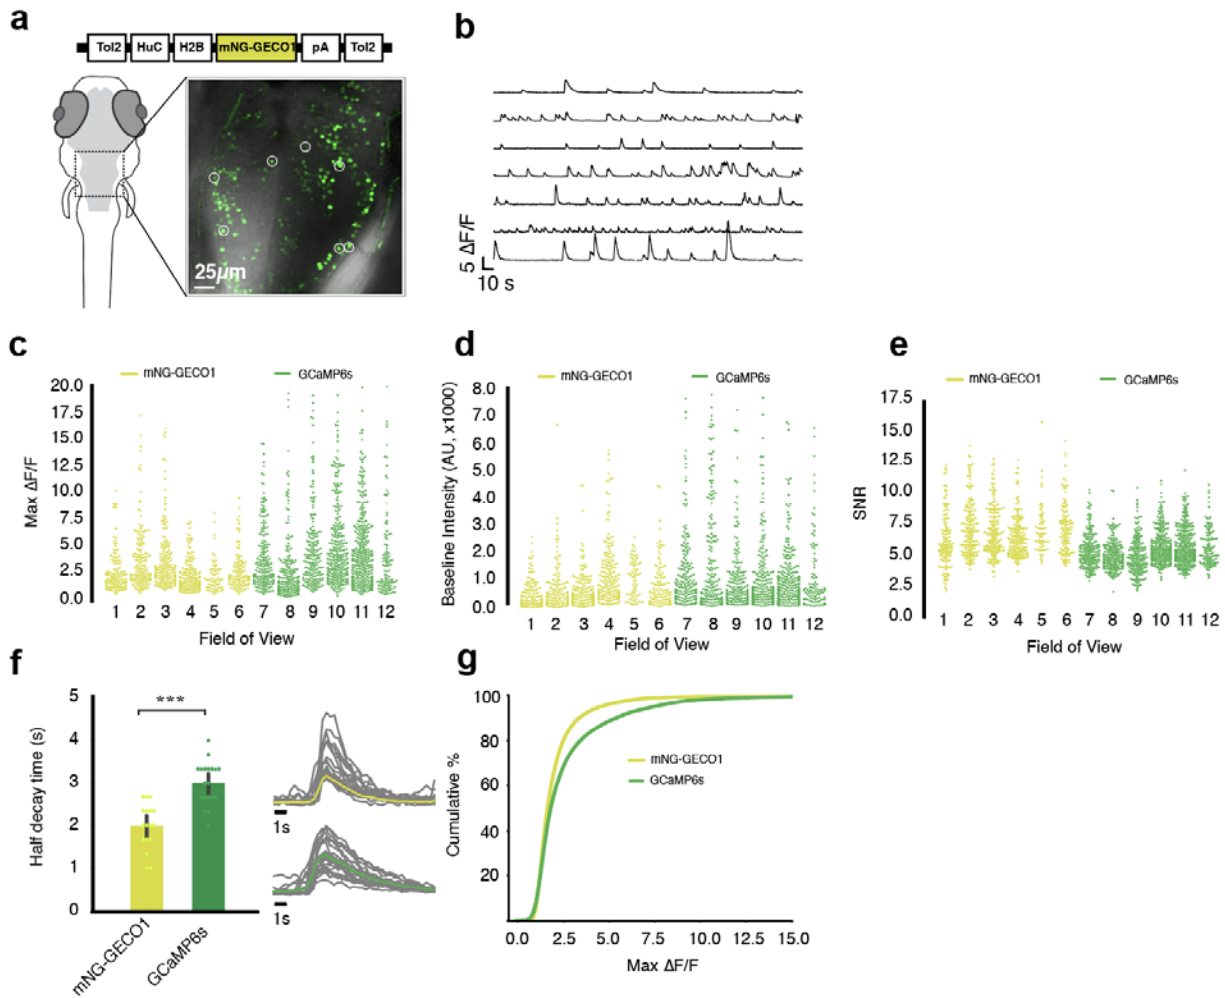

589

590 **Figure 3 Characterization of mNG-GECO1 and GCaMP6s in transgenic zebrafish hind**  
 591 **brain tissue.** **a** Schematic representation of Tol2[HuC-H2B-mNG-GECO1] construct and  
 592 confocal image of one fish (5 to 6 days post fertilization) with 7 region of interests (ROI) circled.  
 593 **b** Traces of ROI's from a). **c** Max  $\Delta F/F_0$  calculated by taking the max peak of each cell within the  
 594 field of interest over 5 minutes; six ROI's each are used from 5 independent fish expressing  
 595 mNG-GECO1 and 5 fish expressing GCaMP6s. **d** Baseline fluorescence intensity of each cell  
 596 within all ROI's from 5 fish; confocal settings are kept consistent between GCaMP6s and mNG-  
 597 GECO1 imaging. **e** Signal-to-noise ratio (SNR) computed by dividing  $\Delta F/F_0$  by raw standard  
 598 deviation of each cell across 6 FOV's each for both sensors. **f** Average half decay time plotted  
 599 for mNG-GECO1 ( $n = 17$ ) and GCaMP6s ( $n = 19$ ) by averaging randomly selected peaks. **g**

600 Cumulative distribution of mNG-GECO1 vs. GCaMP6s. All cells are arranged in incremental  
601 order of  $\Delta F/F_0$  and plotted with respect to their  $\Delta F/F_0$  and their position in the order (%).

602 **Supplementary Figures and Tables**

603 **Supplementary Table 1. In vitro characterization of mNG-GECO1 and GCaMP6s.** mNG,  
 604 mNG-GECO1, and GCaMP6s were purified and tested in parallel. mNG was used as a standard  
 605 for brightness and quantum yield determination.

| Indicator         | Excitation Maximum (nm) (C/a <sup>2</sup> ) |                  | Emission Maximum (nm) (C/a <sup>2</sup> ) | Quantum Yield (Ca <sup>2+</sup> sat.) | Fluorescence                                                   |                          | Brightness Relative to GCaMP6s | Brightness Relative to mNG | K <sub>d</sub> (nM) | k <sub>off</sub> (s <sup>-1</sup> ) |
|-------------------|---------------------------------------------|------------------|-------------------------------------------|---------------------------------------|----------------------------------------------------------------|--------------------------|--------------------------------|----------------------------|---------------------|-------------------------------------|
|                   | λ <sub>exc</sub>                            | λ <sub>exc</sub> |                                           |                                       | ε (mM <sup>-1</sup> cm <sup>-1</sup> ); Ca <sup>2+</sup> sat.) | Brig htness <sup>a</sup> |                                |                            |                     |                                     |
| <b>mNeonGreen</b> | 506                                         | 517              | 0.8 <sup>b</sup>                          | 112,000<br>+/- 900                    | 90                                                             | 205%                     | 100%                           | NA                         | NA                  | NA                                  |
| <b>mNG-GECO1</b>  | 496                                         | 513              | 0.69<br>+/- 0.01                          | 102,000<br>+/- 2,700                  | 70                                                             | 159%                     | 78%                            | 35                         | 807<br>+/- 1        | 1.57<br>+/- 0.01                    |
| <b>GCaMP6s</b>    | 497                                         | 512              | 0.59<br>+/- 0.02                          | 74,000<br>+/- 500                     | 44                                                             | 100%                     | 49%                            | 39                         | 147<br>+/- 1        | 1.06<br>+/- 0.01                    |

<sup>a</sup>Product of ε in mM<sup>-1</sup>cm<sup>-1</sup> and Φ (no units)

<sup>b</sup>From Ref.<sup>21</sup>

606



607 **Supplementary Table 2. Characterization of Ca<sup>2+</sup>-dependent fluorescence of mNG-GECO1**  
608 **and GCaMP6s in HeLa cells.** Cells were treated with histamine (abb. His), then with  
609 Ca<sup>2+</sup>/ionomycin (abb. Ca<sup>2+</sup>), and then with EGTA/ionomycin (abb. EGTA). n is the total number  
610 of cells recorded over five independent transfections. The oscillations were detected in all cells  
611 with a prominence of greater than 0.5 using a Matlab script. Errors are s.d.

| Protein   | Number of HeLa cells (n) | Total Number of oscillations detected | Maximum Ca <sup>2+</sup> to minimum EGTA $\Delta F/F_0$ | Maximum His to minimum His ratio | Maximum His to maximum Ca <sup>2+</sup> ratio |
|-----------|--------------------------|---------------------------------------|---------------------------------------------------------|----------------------------------|-----------------------------------------------|
| mNG-GECO1 | 137                      | 1624                                  | 4.50 ± 2.96                                             | 48.8 ± 15.1                      | 16.8 ± 10.5                                   |
| GCaMP6s   | 99                       | 687                                   | 3.48 ± 2.40                                             | 16.7 ± 5.2                       | 12.8 ± 6.11                                   |

612

613 **Supplementary Table 3. mNG-GECO1 comparison with GCaMP series sensors in**  
 614 **dissociated rat hippocampal neurons.** Median values were calculated per well and mean (of  
 615 medians)  $\pm$  s.e.m. are presented. SNR values were calculated per individual cells, and median  $\pm$   
 616 s.e.m are shown.

| Protein       | 1 AP<br>$\Delta F/F_0$<br>amplitude | 3 AP<br>$\Delta F/F_0$<br>amplitude | 10 AP<br>$\Delta F/F_0$<br>amplitude | 160 AP<br>$\Delta F/F_0$<br>amplitude | Baseline<br>Brightness<br>(Fluorescence<br>Intensity<br>(AU)) | Half<br>rise<br>time 3<br>APs<br>(ms) | Half<br>decay<br>time 3<br>APs (ms) | SNR 1 APs       | SNR 3 APs       |
|---------------|-------------------------------------|-------------------------------------|--------------------------------------|---------------------------------------|---------------------------------------------------------------|---------------------------------------|-------------------------------------|-----------------|-----------------|
| mNG-<br>GECO1 | 0.19 $\pm$ 0.04                     | 0.5 $\pm$ 0.07                      | 1.5 $\pm$ 0.19                       | 6.5 $\pm$ 0.8                         | 1374 $\pm$ 31                                                 | 49 $\pm$ 1                            | 582 $\pm$ 12                        | 8.9 $\pm$ 0.01  | 20.3 $\pm$ 0.02 |
| GCaMP6s       | 0.27 $\pm$ 0.09                     | 0.7 $\pm$ 0.08                      | 3.1 $\pm$ 0.26                       | 9.0 $\pm$ 0.47                        | 1302 $\pm$ 26                                                 | 65 $\pm$ 2                            | 1,000 $\pm$ 36                      | 10.1 $\pm$ 0.07 | 25.0 $\pm$ 0.03 |
| jGCaMP7b      | 0.6 $\pm$ 0.07                      | 1.2 $\pm$ 0.08                      | 2.9 $\pm$ 0.1                        | 3.5 $\pm$ 0.09                        | 3673 $\pm$ 32                                                 | 47 $\pm$ 0.1                          | 523 $\pm$ 2                         | 27.4 $\pm$ 0.01 | 57.8 $\pm$ 0.01 |
| jGCaMP7c      | 0.3 $\pm$ 0.03                      | 0.8 $\pm$ 0.04                      | 3.9 $\pm$ 0.2                        | 16.7 $\pm$ 0.58                       | 770 $\pm$ 6                                                   | 49 $\pm$ 0.1                          | 513 $\pm$ 1                         | 9.3 $\pm$ 0.003 | 21.9 $\pm$ 0.01 |
| jGCaMP7f      | 0.3 $\pm$ 0.06                      | 0.8 $\pm$ 0.05                      | 2.9 $\pm$ 0.1                        | 7.9 $\pm$ 0.25                        | 1797 $\pm$ 16                                                 | 46 $\pm$ 0.1                          | 669 $\pm$ 2                         | 13.6 $\pm$ 0.01 | 28.7 $\pm$ 0.01 |
| jGCaMP7s      | 0.7 $\pm$ 0.10                      | 2.0 $\pm$ 0.11                      | 4.6 $\pm$ 0.17                       | 4.2 $\pm$ 0.12                        | 1397 $\pm$ 11                                                 | 42 $\pm$ 0.1                          | 736 $\pm$ 2                         | 24.5 $\pm$ 0.01 | 57.9 $\pm$ 0.02 |

617

618

619 **Supplementary Table 4. mNG-GECO1 comparison with GCaMP6s in larval zebrafish 6**  
620 **dpf.** Mean values were calculated for the total number of cells (ROI's) across six FOV's in five  
621 independent fish. Mean  $\pm$  s.e.m. are presented. For max  $\Delta F/F_0$ , the maximum  $\Delta F/F_0$  from each  
622 cell is used. For baseline brightness, the raw intensity of the indicator under the same set of  
623 imaging conditions is used. For half decay time, 17 and 19 represented cells were used for  
624 mNG-GECO1 and GCaMP6s, respectively. The difference in max  $\Delta F/F_0$  for the two indicators is  
625 significant (Kolmogorov-Smirnov statistic = 0.218, p-value =  $1.79 \times 10^{-21}$ ). The difference in  
626 baseline brightness for the two indicators is significant (Kolmogorov-Smirnov statistic = 0.100, p-  
627 value  $\approx 7.31 \times 10^{-5}$ ). The difference in half decay time for the two indicators is significant  
628 (Kolmogorov-Smirnov statistic = 0.666, p-value  $\approx 3.00 \times 10^{-4}$ ).

| Protein   | # of biological replicates | # of total field of views (FOV) | # of total cells (N) | Max $\Delta F/F_0$ | Baseline Brightness ( $\times 1000$ ) (AU) | Signal to noise ratio (SNR) | Half decay time ( $s^{-1}$ ) (n) |
|-----------|----------------------------|---------------------------------|----------------------|--------------------|--------------------------------------------|-----------------------------|----------------------------------|
| mNG-GECO1 | 5                          | 6                               | 834                  | 3.09<br>$\pm 0.08$ | 0.95<br>$\pm 0.03$                         | 6.63<br>$\pm 0.07$          | 1.98 $\pm$<br>0.12<br>(17)       |
| GCaMP6s   | 5                          | 6                               | 1280                 | 4.56<br>$\pm 0.11$ | 1.41<br>$\pm 0.05$                         | 5.25<br>$\pm 0.04$          | 3.00 $\pm$<br>0.12<br>(19)       |

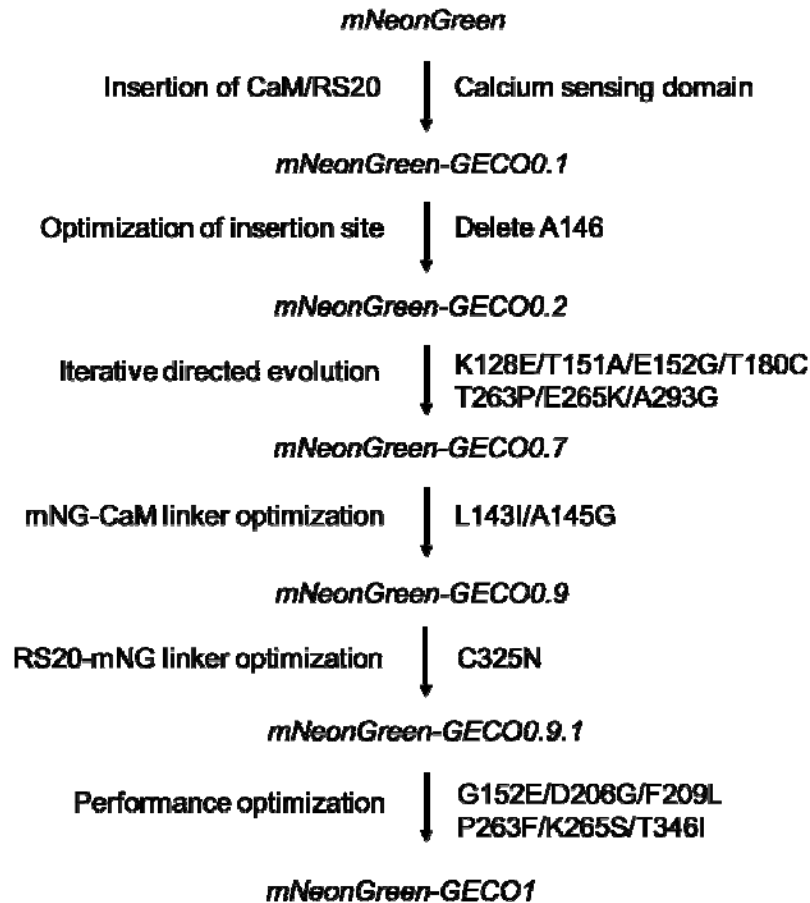

629

630 **Supplementary Figure 1 Overview of mNG-GECO1 development**

631 Lineage of mNG-GECO variants starting from initial insertion of Ca<sup>2+</sup> sensing domain into mNG,  
632 and ending with the final mNG-GECO1 variant.

|               |            |            |            |            |            |            |                                         |
|---------------|------------|------------|------------|------------|------------|------------|-----------------------------------------|
|               |            | 20         |            | 40         |            | 60         |                                         |
| mNG-GECO0.1   | MVSKGEEDNM | ASLPATHELH | IFGSI      | INGVDF     | DMVGQGTGNP | NDGYEELNLK | STKGDLOQFSP 60                          |
| mNG-GECO0.2   | MVSKGEEDNM | ASLPATHELH | IFGSI      | INGVDF     | DMVGQGTGNP | NDGYEELNLK | STKGDLOQFSP 60                          |
| mNG-GECO0.7   | MVSKGEEDNM | ASLPATHELH | IFGSI      | INGVDF     | DMVGQGTGNP | NDGYEELNLK | STKGDLOQFSP 60                          |
| mNG-GECO0.9   | MVSKGEEDNM | ASLPATHELH | IFGSI      | INGVDF     | DMVGQGTGNP | NDGYEELNLK | STKGDLOQFSP 60                          |
| mNG-GECO0.9.1 | MVSKGEEDNM | ASLPATHELH | IFGSI      | INGVDF     | DMVGQGTGNP | NDGYEELNLK | STKGDLOQFSP 60                          |
| mNG-GECO1     | MVSKGEEDNM | ASLPATHELH | IFGSI      | INGVDF     | DMVGQGTGNP | NDGYEELNLK | STKGDLOQFSP 60                          |
|               |            | 80         |            | 100        |            | 120        |                                         |
| mNG-GECO0.1   | WILVPHI    | GYG        | FHQYLPYPD  | G          | MSPFQAAMVD | GSGYQVHRTM | QFEDGASLTV NYRYTYEGSH 120               |
| mNG-GECO0.2   | WILVPHI    | GYG        | FHQYLPYPD  | G          | MSPFQAAMVD | GSGYQVHRTM | QFEDGASLTV NYRYTYEGSH 120               |
| mNG-GECO0.7   | WILVPHI    | GYG        | FHQYLPYPD  | G          | MSPFQAAMVD | GSGYQVHRTM | QFEDGASLTV NYRYTYEGSH 120               |
| mNG-GECO0.9   | WILVPHI    | GYG        | FHQYLPYPD  | G          | MSPFQAAMVD | GSGYQVHRTM | QFEDGASLTV NYRYTYEGSH 120               |
| mNG-GECO0.9.1 | WILVPHI    | GYG        | FHQYLPYPD  | G          | MSPFQAAMVD | GSGYQVHRTM | QFEDGASLTV NYRYTYEGSH 120               |
| mNG-GECO1     | WILVPHI    | GYG        | FHQYLPYPD  | G          | MSPFQAAMVD | GSGYQVHRTM | QFEDGASLTV NYRYTYEGSH 120               |
|               |            | 140        |            | 160        |            | 180        |                                         |
| mNG-GECO0.1   | INGEAQVKGT | GFPADGPVMT | NSLTA      | TRDQ       | LTEEQIAEFK | EAFSLFDKDG | DGTITTKELG 180                          |
| mNG-GECO0.2   | INGEAQVKGT | GFPADGPVMT | NSLTA      | TRDQ       | LTEEQIAEFK | EAFSLFDKDG | DGTITTKELG 179                          |
| mNG-GECO0.7   | INGEAQV    | EGT        | GFPADGPVMT | NSLTA      | TRDQ       | LAGEQIAEFK | EAFSLFDKDG DGTITTKELG 179               |
| mNG-GECO0.9   | INGEAQV    | EGT        | GFPADGPVMT | NSITG      | TRDQ       | LAGEQIAEFK | EAFSLFDKDG DGTITTKELG 179               |
| mNG-GECO0.9.1 | INGEAQV    | EGT        | GFPADGPVMT | NSITG      | TRDQ       | LAGEQIAEFK | EAFSLFDKDG DGTITTKELG 179               |
| mNG-GECO1     | INGEAQV    | EGT        | GFPADGPVMT | NSITG      | TRDQ       | LAEEQIAEFK | EAFSLFDKDG DGTITTKELG 179               |
|               |            | 200        |            | 220        |            | 240        |                                         |
| mNG-GECO0.1   | TVLRS      | LGQNP      | TEAELQDMIN | EVDADGDGTF | DFPEFLTMM  | RKMNDADSEE | EIREAFRVFD 240                          |
| mNG-GECO0.2   | TVLRS      | LGQNP      | TEAELQDMIN | EVDADGDGTF | DFPEFLTMM  | RKMNDADSEE | EIREAFRVFD 239                          |
| mNG-GECO0.7   | CVLRS      | LGQNP      | TEAELQDMIN | EVDADGDGTF | DFPEFLTMM  | RKMNDADSEE | EIREAFRVFD 239                          |
| mNG-GECO0.9   | CVLRS      | LGQNP      | TEAELQDMIN | EVDADGDGTF | DFPEFLTMM  | RKMNDADSEE | EIREAFRVFD 239                          |
| mNG-GECO0.9.1 | CVLRS      | LGQNP      | TEAELQDMIN | EVDADGDGTF | DFPEFLTMM  | RKMNDADSEE | EIREAFRVFD 239                          |
| mNG-GECO1     | CVLRS      | LGQNP      | TEAELQDMIN | EVDADGG    | GGTL       | DFPEFLTMM  | RKMNDADSEE EIREAFRVFD 239               |
|               |            | 260        |            | 280        |            | 300        |                                         |
| mNG-GECO0.1   | KDNGYI     | GAA        | ELRHVMTDLG | EKL        | TDEEVDE    | MIRVADIDGD | GQVNYEEFVQ MMTAKGGGGS 300               |
| mNG-GECO0.2   | KDNGYI     | GAA        | ELRHVMTDLG | EKL        | TDEEVDE    | MIRVADIDGD | GQVNYEEFVQ MMTAKGGGGS 299               |
| mNG-GECO0.7   | KDNGYI     | GAA        | ELRHVMTDLG | EKL        | PK         | KEVDE      | MIRVADIDGD GQVNYEEFVQ MMTGKGGGGS 299    |
| mNG-GECO0.9   | KDNGYI     | GAA        | ELRHVMTDLG | EKL        | PK         | KEVDE      | MIRVADIDGD GQVNYEEFVQ MMTGKGGGGS 299    |
| mNG-GECO0.9.1 | KDNGYI     | GAA        | ELRHVMTDLG | EKL        | PK         | KEVDE      | MIRVADIDGD GQVNYEEFVQ MMTGKGGGGS 299    |
| mNG-GECO1     | KDNGYI     | GAA        | ELRHVMTDLG | EKL        | F          | DSEVDE     | MIRVADIDGD GQVNYEEFVQ MMTGKGGGGS 299    |
|               |            | 320        |            | 340        |            | 360        |                                         |
| mNG-GECO0.1   | VDSSRRKWNK | AGHAVRAIGR | LSSD       | WCRS       | KK         | TYPNDKTIIS | TFKWSYTTGN GKRYRSTART 360               |
| mNG-GECO0.2   | VDSSRRKWNK | AGHAVRAIGR | LSSD       | WCRS       | KK         | TYPNDKTIIS | TFKWSYTTGN GKRYRSTART 359               |
| mNG-GECO0.7   | VDSSRRKWNK | AGHAVRAIGR | LSSD       | WCRS       | KK         | TYPNDKTIIS | TFKWSYTTGN GKRYRSTART 359               |
| mNG-GECO0.9   | VDSSRRKWNK | AGHAVRAIGR | LSSD       | WCRS       | KK         | TYPNDKTIIS | TFKWSYTTGN GKRYRSTART 359               |
| mNG-GECO0.9.1 | VDSSRRKWNK | AGHAVRAIGR | LSSD       | W          | NR         | RS         | KK TYPNDKTIIS TFKWSYTTGN GKRYRSTART 359 |
| mNG-GECO1     | VDSSRRKWNK | AGHAVRAIGR | LSSD       | W          | NR         | RS         | KK TYPNDKTIIS TFKWSYITGN GKRYRSTART 359 |
|               |            | 360        |            | 400        |            |            |                                         |
| mNG-GECO0.1   | TYTFAK     | PMAA       | NYLKNQPMYV | FRKTELKHSK | TELNFKEWQK | AFTDVMGMDE | LYK 413                                 |
| mNG-GECO0.2   | TYTFAK     | PMAA       | NYLKNQPMYV | FRKTELKHSK | TELNFKEWQK | AFTDVMGMDE | LYK 412                                 |
| mNG-GECO0.7   | TYTFAK     | PMAA       | NYLKNQPMYV | FRKTELKHSK | TELNFKEWQK | AFTDVMGMDE | LYK 412                                 |
| mNG-GECO0.9   | TYTFAK     | PMAA       | NYLKNQPMYV | FRKTELKHSK | TELNFKEWQK | AFTDVMGMDE | LYK 412                                 |
| mNG-GECO0.9.1 | TYTFAK     | PMAA       | NYLKNQPMYV | FRKTELKHSK | TELNFKEWQK | AFTDVMGMDE | LYK 412                                 |
| mNG-GECO1     | TYTFAK     | PMAA       | NYLKNQPMYV | FRKTELKHSK | TELNFKEWQK | AFTDVMGMDE | LYK 412                                 |

633

634 **Supplementary Figure 2 Sequence alignment of mNG-GECO variants**

635 Alignment of mNG-GECO variants 0.2, 0.7, 0.9, 0.9.1, and 1. Similar to the topological  
636 representation in **Fig. 1a**, mNG barrel (yellow), CaM (light blue), RS20 (green), linker  
637 regions (black), mutations (red), and the chromophore forming residues (black box over  
638 “GYG”). Also highlighted are the two residues that flank the insertion site (residue 136 of  
639 mNG in purple and residue 139 in magenta; numbering as in PDB ID 5LTR), which are  
640 shown as circles in both the protein structure and gene schematic in **Fig. 1a**.

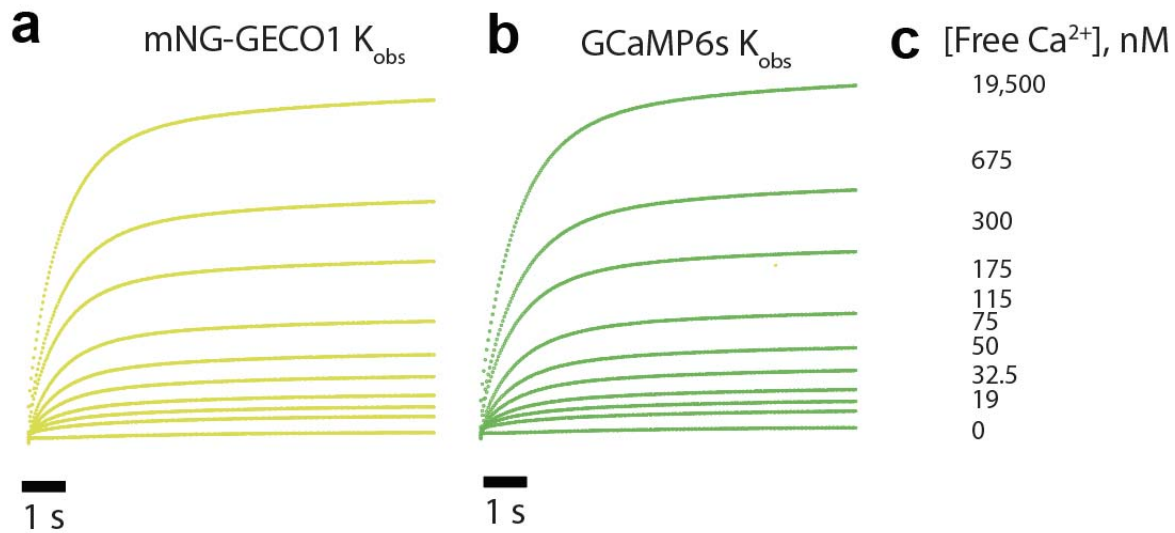

641

642 **Supplementary Figure 3**  $K_{on}$ , (observed) traces of mNG-GECO1 and GCaMP6s purified  
643 protein using Photophysics SX-20 Stopped-flow. Each protein buffered in 30 mM MOPS, 100  
644 mM KCl, 50  $\mu$ M EGTA is rapidly mixed at 1:1 ratio with varying concentrations of  $Ca^{2+}$  produced  
645 by reciprocal dilutions of 10 mM EGTA and 10 mM CaEGTA. **a** mNG-GECO1 change in  
646 fluorescence over time as  $Ca^{2+}$  is rapidly mixed. **b** GCaMP6s change in fluorescence over time  
647 as  $Ca^{2+}$  is rapidly mixed. **c** Final free- $Ca^{2+}$  concentrations produced after reciprocal dilutions.  
648 mNG-GECO1 and GCaMP6s fit with a double exponential curve due to a slow rate limiting step  
649 likely caused by the conformational change of the proteins upon binding to  $Ca^{2+}$ . Both sensors  
650 have a similar  $t_{1/2}$  for physiologically relevant  $Ca^{2+}$  concentrations.

651

652

653

654

655

656

657

658

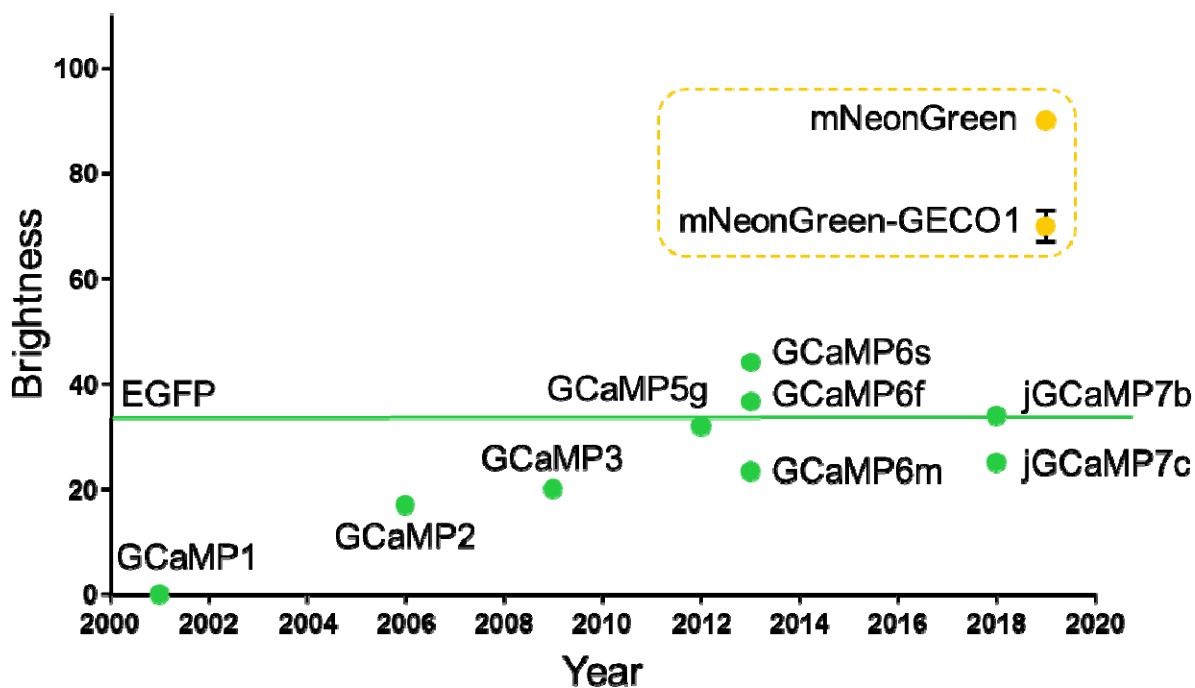

659

660 **Supplementary Figure 4** *In vitro* brightness comparison of mNG-GECO1 to GCaMP series

661 1P purified protein brightness of first generation mNG-GECO1 compared to the GCaMP series

662 of Ca<sup>2+</sup> indicators. mNG-GECO1 is substantially brighter *in vitro* than the highly-engineered

663 GCaMP series, which is roughly as bright as its own scaffold, EGFP.

664

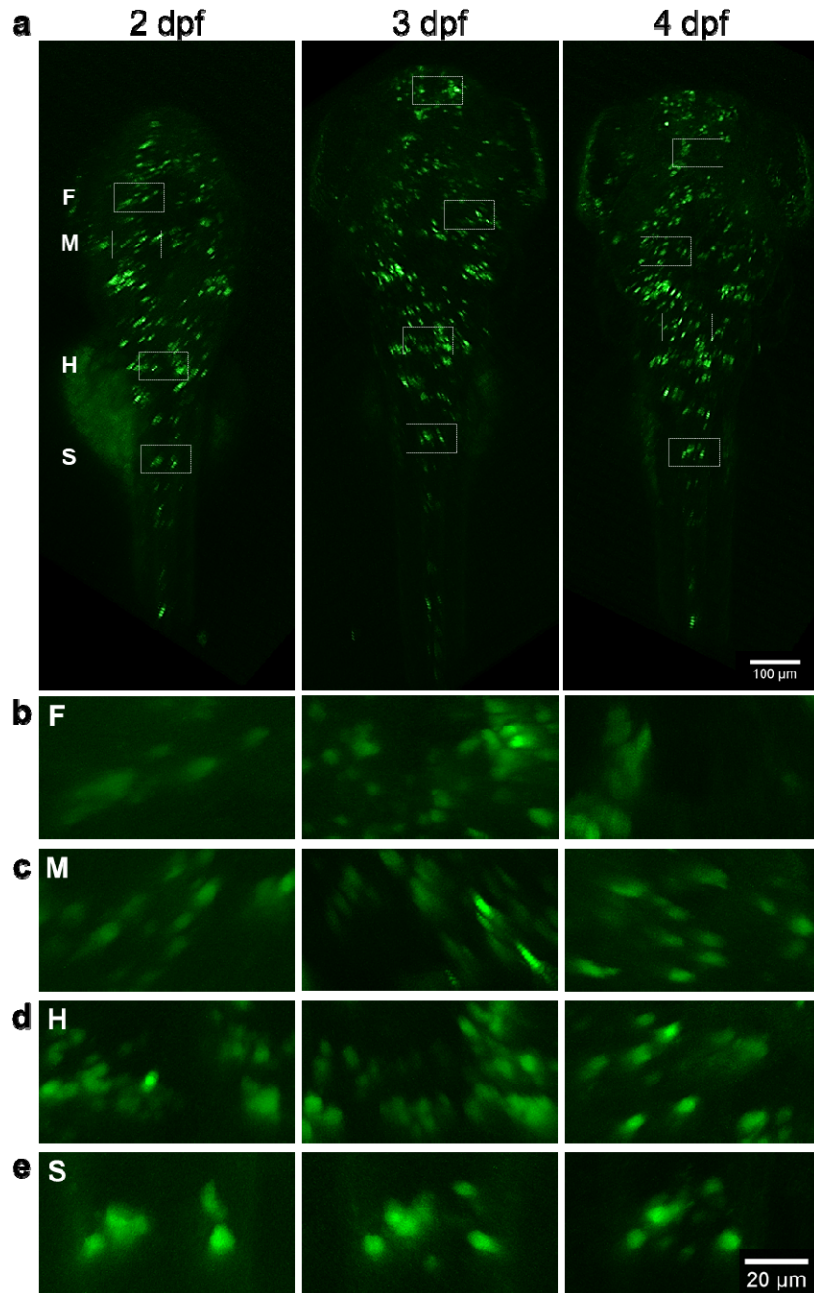

665

666 **Supplementary Figure 5 mNG-GECO1 expression profile in zebrafish larvae.** Transient  
667 expression of mNG-GECO1 in Tg[elavl3:mNG-GECO1] zebrafish at 2, 3 and 4 days post-  
668 fertilization. **a** Dorsal view of confocal z-projections obtained from the whole larvae. Small  
669 dashed squares mark areas that have been enlarged and presented in b-e. **b-e** Shows areas in  
670 the forebrain (F), midbrain (M), hindbrain (H) and spine (S). Scale bars are 100 μm in A and 20  
671 μm in b-e as shown bottom right in e.

672



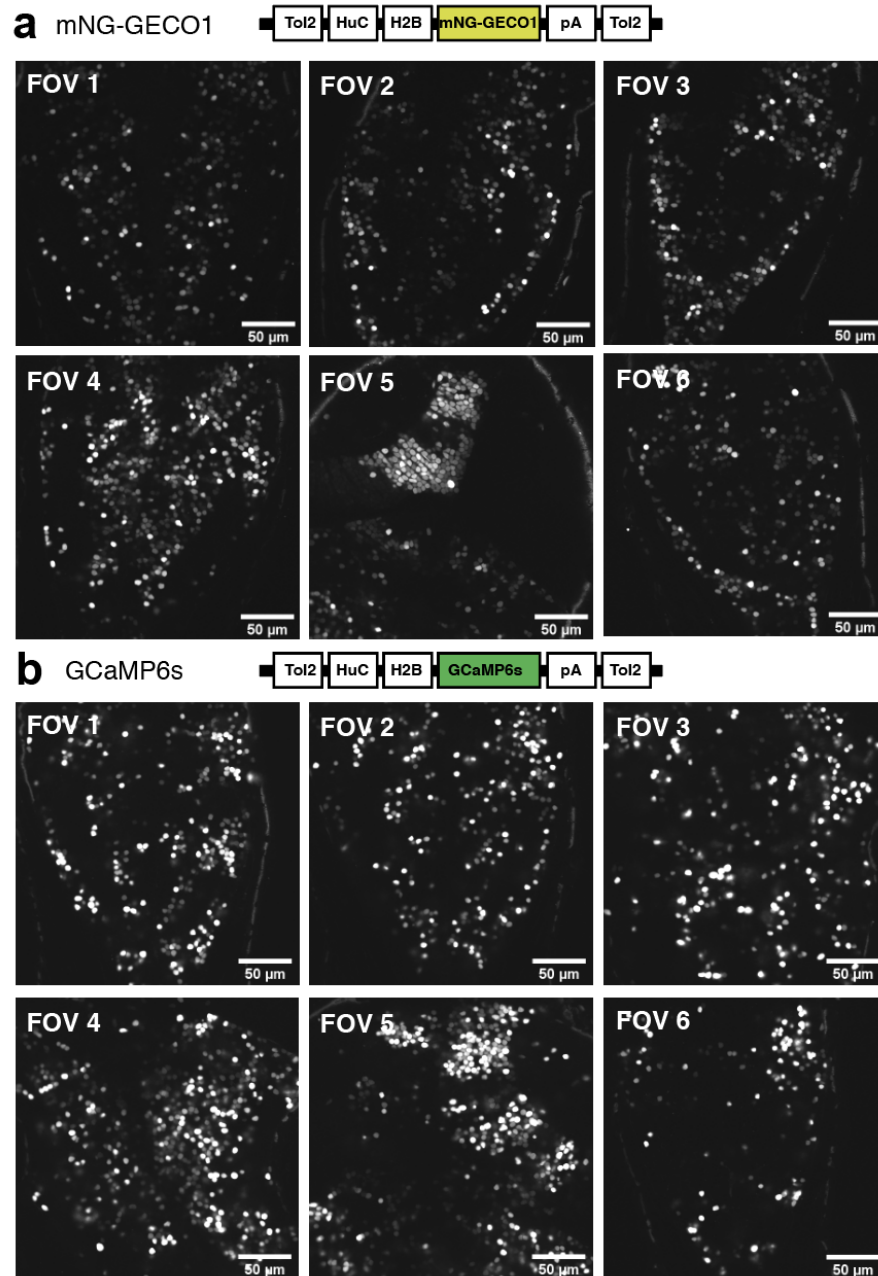

673

674 **Supplementary Figure 6 mNG-GECO1 and GCaMP6s field of views (FOV) in zebrafish**  
675 **larvae used for quantification.** Transient expression of mNG-GECO1 and GCaMP6s in  
676 zebrafish at 6 days post-fertilization. Each FOV image is an average intensity of a 5 minute  
677 recording encoding 900 frames. The relative fluorescence intensity is to-scale between the two  
678 sensors. **a** FOVs from larvae expressing mNG-GECO1. **b** FOVs from larvae expressing  
679 GCaMP6s. Scale bar is 50 μm for all images.

680

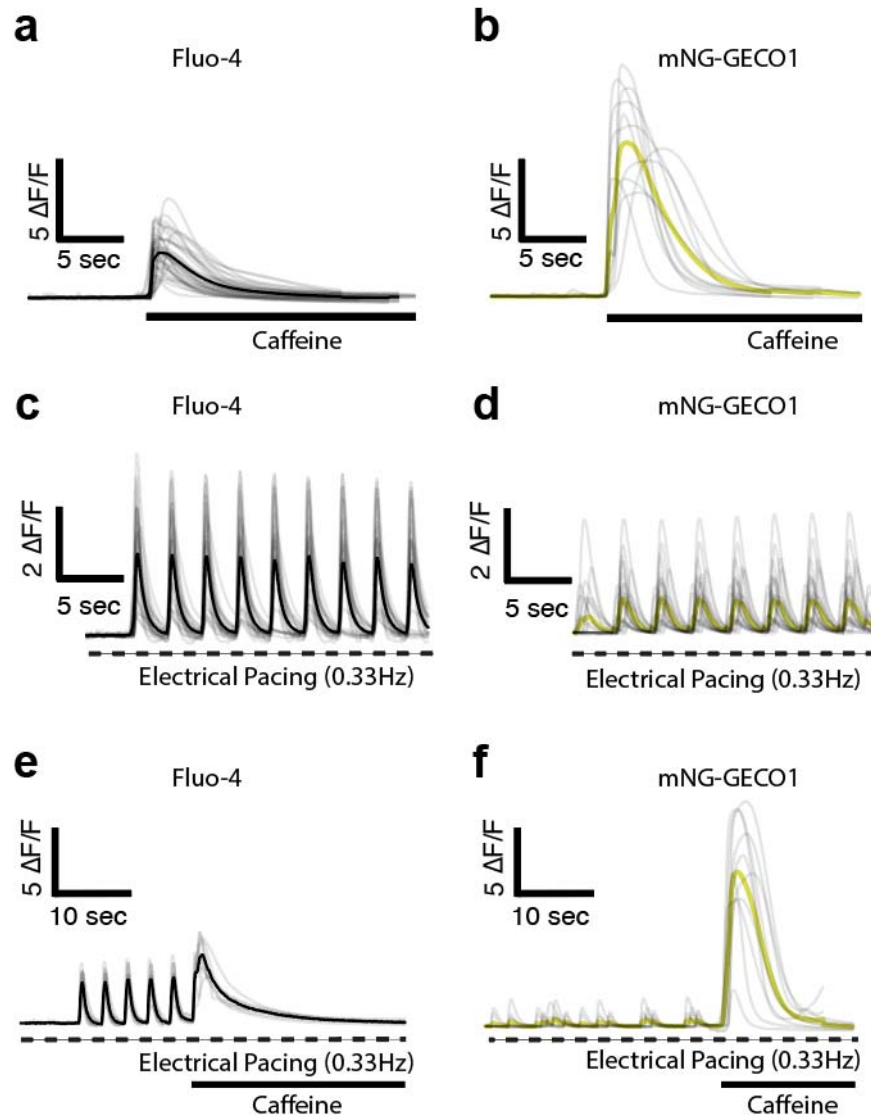

681

682 **Supplementary Figure 7** Comparison of Fluo-4 Ca<sup>2+</sup> dye and mNG-GECO1 in human iPSC-  
683 derived cardiomyocytes. **a, b** Single cell Ca<sup>2+</sup> transient traces from iPSC-CM's loaded with the  
684 Fluo-4 Ca<sup>2+</sup> dye (n = 38 regions of interests [ROI's]) or mNG-GECO1 (n=11 ROI's), respectively.  
685 Ca<sup>2+</sup> transients were evoked using 20 mM caffeine. **c, d** Ca<sup>2+</sup> transients evoked by electrical  
686 pacing were recorded with the Fluo-4 Ca<sup>2+</sup> dye (n = 25 ROI's) or mNG-GECO1 (n = 22 ROI's),  
687 respectively. Cells were stimulated electrically at 0.33 Hz and imaged at 10 Hz frame rate. **e, f**  
688 Ca<sup>2+</sup> transients evoked by electrical pacing (0.33 Hz) and caffeine treatment (10 mM) were  
689 recorded at 10 Hz with the Fluo-4 Ca<sup>2+</sup> dye (n = 8 ROI's) or mNG-GECO1 (n = 8 ROI's),  
690 respectively.
